# Supplementary material for: Computer-Aided Virtual Screening and In Vitro Validation of Biomimetic Tyrosinase Inhibitory Peptides from Abalone Peptidome
Source: MDPI journal article supplement (doi:10.3390/ijms24043154), 2023-02-05
Supplement: s1 [file s1]

**Table S1.** Prediction probability of tyrosinase inhibitory activity of abalone peptides by KNN and RF-based predictors (Modified from Kongsompong et al., 2021)

| No | Peptide sequence                      | Prediction probability |              |
|----|---------------------------------------|------------------------|--------------|
|    |                                       | kNN predictor          | RF predictor |
| 1  | TASSDAWYR                             | 0.97                   | 0.71         |
| 2  | SAPFMPDAFFRNV                         | 0.79                   | 0.54         |
| 3  | SAPTFFR                               | 0.00                   | 0.63         |
| 4  | NSSLRVQSR                             | 0.00                   | 0.60         |
| 5  | SQSNRSVSR                             | 0.00                   | 0.52         |
| 6  | SALDSL                                | 0.00                   | 0.51         |
| 7  | NICECMK                               | 1.00                   | 0.39         |
| 8  | TSQMSRSSR                             | 1.00                   | 0.37         |
| 9  | KKNYRVSEAYK                           | 1.00                   | 0.32         |
| 10 | SASCSQRSRSRER                         | 1.00                   | 0.10         |
| 11 | ASRSGSSRRK                            | 1.00                   | 0.10         |
| 12 | RGNEMCKK                              | 1.00                   | 0.08         |
| 13 | GGEKGKGRGGERGGR                       | 1.00                   | 0.07         |
| 14 | QFVRNGFEHWGSDHQGVETTRRFLLEMLSFHR      | 1.00                   | 0.06         |
| 15 | NPRYYQGGEDEGSFR                       | 1.00                   | 0.06         |
| 16 | VPTNSSNCNCRNPNTCEVEGNCKMK             | 1.00                   | 0.06         |
| 17 | SIPCALK                               | 1.00                   | 0.06         |
| 18 | MGLAIQSLAELLIVR                       | 1.00                   | 0.06         |
| 19 | ICAEKKVGSACK                          | 1.00                   | 0.05         |
| 20 | YFFIFYLCK                             | 1.00                   | 0.05         |
| 21 | DKLLEFLPAMTRNLSFYDVAEITK              | 1.00                   | 0.04         |
| 22 | SRSSSRSSGK                            | 1.00                   | 0.04         |
| 23 | ELINEILSDTKFLAAIQEHNPEFFVVDNFMYIRNILV | 1.00                   | 0.03         |
| 24 | LACKKIMEDR                            | 1.00                   | 0.03         |
| 25 | SNSPTNMSK                             | 1.00                   | 0.03         |
| 26 | SRSKSGRSR                             | 1.00                   | 0.03         |
| 27 | MGRFFMSLLSMLLVSCQVASFTISR             | 1.00                   | 0.03         |
| 28 | YFSLASDQGSVDGQLQLGIMYFSGNGVRKDYKMA    | 1.00                   | 0.03         |
| 29 | ILKCVGEKMCVEVR                        | 1.00                   | 0.03         |
| 30 | SYTHAKAGTLLCGFIKLLPMFLLVFPGMIAR       | 1.00                   | 0.02         |
| 31 | DCVTLTKAVMKARDACR                     | 1.00                   | 0.02         |
| 32 | PELCEDR                               | 1.00                   | 0.02         |
| 33 | PTRASSLSSVNSQNMK                      | 1.00                   | 0.02         |
| 34 | LCDALDVFAK                            | 1.00                   | 0.01         |
| 35 | NVLTNFYVK                             | 1.00                   | 0.01         |
| 36 | ETERQTKRQHTTSHAHVCMFECTNVCK           | 1.00                   | 0.01         |
| 37 | REQNGQGDLVNNAYSAVXAIFDNLGKK           | 1.00                   | 0.01         |
| 38 | CSDACACGKQCTEPK                       | 1.00                   | 0.01         |
| 39 | PDKGQFPDAGNEDPIWR                     | 1.00                   | 0.01         |
| 40 | PDTSTPDSGEEMDPAR                      | 1.00                   | 0.01         |
| 41 | RQSVFYASKGK                           | 1.00                   | 0.01         |
| 42 | DALPWMHGDALMSALK                      | 1.00                   | 0.01         |
| 43 | MDFYEIHNM                             | 1.00                   | 0.01         |

|    |                                    |      |      |
|----|------------------------------------|------|------|
| 44 | GGYSGPTCKVNVCK                     | 1.00 | 0.01 |
| 45 | DAEDATKALDGTR                      | 1.00 | 0.01 |
| 46 | EASLQLKMQTITKFECNSDSCNNR           | 1.00 | 0.01 |
| 47 | CDMENAK                            | 1.00 | 0.00 |
| 48 | KALSGACDALMCK                      | 1.00 | 0.00 |
| 49 | LSVVSDASSNTTSGIVSDRMTVSLMMEMIIAER  | 1.00 | 0.00 |
| 50 | TGTFTALDALYK                       | 1.00 | 0.00 |
| 51 | DRVNALIDLTDALK                     | 1.00 | 0.00 |
| 52 | SHFPDIVPDGRPKKSK                   | 1.00 | 0.00 |
| 53 | MSTLSDMTCR                         | 1.00 | 0.00 |
| 54 | ACACGAENCSGFLGVR                   | 1.00 | 0.00 |
| 55 | NGLMMYTVNHEITNVASENSDNLK           | 1.00 | 0.00 |
| 56 | CQVTDCK                            | 1.00 | 0.00 |
| 57 | SPLQNVYLPYVQRLVEVKLRIGHAMAR        | 1.00 | 0.00 |
| 58 | ATVRPDAGQMRVFGK                    | 1.00 | 0.00 |
| 59 | NYPNAYDVR                          | 1.00 | 0.00 |
| 60 | LMNSLKDTNSPK                       | 1.00 | 0.00 |
| 61 | TQCIDVDMCKGNPCTDGCVETEEGTGFLCTCPGK | 1.00 | 0.00 |
| 62 | SSSVNLTKDNLKNMVNAPR                | 1.00 | 0.00 |
| 63 | KDYQPYDRKDYQTPDR                   | 1.00 | 0.00 |
| 64 | HACLSGARCLMEMNKYK                  | 1.00 | 0.00 |
| 65 | VTCLNIACK                          | 1.00 | 0.12 |
| 66 | PFECMCKK                           | 1.00 | 0.32 |
| 67 | DCVIACMK                           | 1.00 | 0.30 |
| 68 | EADMCKK                            | 1.00 | 0.35 |
| 69 | QYHCEICGNSFSR                      | 1.00 | 0.24 |
| 70 | IGCVSMFSSR                         | 0.99 | 0.02 |
| 71 | PTKAMCNLR                          | 0.99 | 0.00 |
| 72 | KCWSSLFTDR                         | 0.99 | 0.03 |
| 73 | WSTDLCR                            | 0.99 | 0.00 |
| 74 | KGICKSR                            | 0.99 | 0.13 |
| 75 | TSSQMCK                            | 0.99 | 0.41 |
| 76 | INTAAMCK                           | 0.99 | 0.03 |
| 77 | TRVLCMK                            | 0.99 | 0.13 |
| 78 | TNCHIMSEK                          | 0.99 | 0.14 |
| 79 | LNCHHKVCPR                         | 0.99 | 0.01 |
| 80 | IFCNFSICDK                         | 0.99 | 0.03 |
| 81 | MTCLRCK                            | 0.99 | 0.00 |
| 82 | LICELSQTHR                         | 0.99 | 0.01 |
| 83 | MCPSNTQAVSTMTR                     | 0.99 | 0.00 |
| 84 | ALMVNPdffQELIFYKK                  | 0.99 | 0.01 |
| 85 | NCGAEHK                            | 0.99 | 0.02 |
| 86 | ERMSCAMKDYPESCAVLVRR               | 0.99 | 0.01 |
| 87 | TQWSNCPTIK                         | 0.99 | 0.00 |
| 88 | MSMHTDGCGR                         | 0.99 | 0.06 |
| 89 | VSTFNNCEDASK                       | 0.99 | 0.00 |
| 90 | LSSKDDCALR                         | 0.99 | 0.02 |

|     |                               |      |      |
|-----|-------------------------------|------|------|
| 91  | MDCMNHK                       | 0.99 | 0.06 |
| 92  | NSLTEIHSCQR                   | 0.99 | 0.01 |
| 93  | EFCCNCGTVADR                  | 0.99 | 0.07 |
| 94  | MIPCSYK                       | 0.99 | 0.05 |
| 95  | SEANKCCAMR                    | 0.99 | 0.07 |
| 96  | VICINMLTFSR                   | 0.99 | 0.05 |
| 97  | VSICGGCNAMR                   | 0.99 | 0.02 |
| 98  | LASAVCSCR                     | 0.99 | 0.01 |
| 99  | EEICSCGK                      | 0.99 | 0.01 |
| 100 | YGNSCADNCSR                   | 0.99 | 0.04 |
| 101 | RQRYKGSLGASYK                 | 0.99 | 0.00 |
| 102 | EAYKSQMTPGSADVAKVTGQYK        | 0.99 | 0.00 |
| 103 | KTRGAYK                       | 0.99 | 0.00 |
| 104 | RCQINCSIKSLDPLYKDMDAYK        | 0.99 | 0.00 |
| 105 | MGSGGSKTPPSQQAVPDK            | 0.99 | 0.00 |
| 106 | LSCRLLQCGDCK                  | 0.99 | 0.01 |
| 107 | SNNSSRSTMLSNSTVNSNMSSRNNSGRSR | 0.99 | 0.03 |
| 108 | NRVALSNMPVK                   | 0.99 | 0.02 |
| 109 | PLFRYTHLDKVECR                | 0.99 | 0.07 |
| 110 | ECRYRVLAREVEAIG               | 0.99 | 0.02 |
| 111 | SVIKKKYGDACNVGDEGGFAPNIQDNK   | 0.99 | 0.05 |
| 112 | SIGKMICNK                     | 0.99 | 0.01 |
| 113 | LEENGVPVDLQTHEKGIEFNGTNAISK   | 0.99 | 0.01 |
| 114 | RAQLRAAR                      | 0.99 | 0.00 |
| 115 | TLKDKADDPAMSIDYK              | 0.99 | 0.01 |
| 116 | ELMKDYKNEVKDILAADK            | 0.99 | 0.00 |
| 117 | TEKDYNIFNDLK                  | 0.99 | 0.00 |
| 118 | NIQKGDYNMVINDYEKAK            | 0.99 | 0.00 |
| 119 | DYLATGSADY                    | 0.99 | 0.00 |
| 120 | NAYSADYMDYFQPK                | 0.99 | 0.00 |
| 121 | IGIHCEWR                      | 0.99 | 0.21 |
| 122 | MPSRVVCFVCGNIGADLPLNIK        | 0.99 | 0.00 |
| 123 | NHFHTVGPRTTNHVEGWHARMNK       | 0.99 | 0.01 |
| 124 | SKKIYCLK                      | 0.99 | 0.00 |
| 125 | IVSSVSVR                      | 0.99 | 0.40 |
| 126 | GEGGGEGDEGDQR                 | 0.99 | 0.05 |
| 127 | MFNNGISFYGDFK                 | 0.99 | 0.01 |
| 128 | VSKSEPGVGDGSVSETMNSVTGSK      | 0.99 | 0.00 |
| 129 | ASVSDPGVSEMK                  | 0.99 | 0.00 |
| 130 | RTLDRLRVQCR                   | 0.99 | 0.00 |
| 131 | MMNGSTHSRTNSWR                | 0.99 | 0.03 |
| 132 | PIMQLSCSYK                    | 0.99 | 0.00 |
| 133 | LLPDNCSTANVSYK                | 0.99 | 0.01 |
| 134 | PDSNDGNSDR                    | 0.99 | 0.02 |
| 135 | SMNCTLGK                      | 0.99 | 0.02 |
| 136 | ALGTELMCR                     | 0.99 | 0.02 |
| 137 | LKIPDSPKEMK                   | 0.99 | 0.00 |

|     |                                |      |      |
|-----|--------------------------------|------|------|
| 138 | SPVCLAKVDK                     | 0.99 | 0.01 |
| 139 | GKGDTCCL                       | 0.99 | 0.00 |
| 140 | QCELSIGDGSVICRKK               | 0.99 | 0.01 |
| 141 | GPESLSFITEYQKLEKERNMDLNNLR     | 0.99 | 0.02 |
| 142 | DPRMRQLCIK                     | 0.99 | 0.00 |
| 143 | LASDCTDKKMR                    | 0.99 | 0.03 |
| 144 | KTHMQSSLCEK                    | 0.99 | 0.01 |
| 145 | CPLRWYMLSSK                    | 0.99 | 0.28 |
| 146 | MLLILAMVLMSTETDAVPLTK          | 0.99 | 0.05 |
| 147 | VSQEQEHFLLNPFGLTYSEVSASSLVK    | 0.99 | 0.02 |
| 148 | CGICGKAFFSDGSNLIAHKK           | 0.99 | 0.01 |
| 149 | LVLVKGKISSILLDMCEE             | 0.99 | 0.01 |
| 150 | GANPDCR                        | 0.99 | 0.00 |
| 151 | LLADSNDCK                      | 0.99 | 0.28 |
| 152 | CISIALR                        | 0.99 | 0.07 |
| 153 | FTAGDCKK                       | 0.99 | 0.05 |
| 154 | SLFDSHNAFCRIAK                 | 0.99 | 0.00 |
| 155 | LTACRMGTEESR                   | 0.98 | 0.00 |
| 156 | CDIDHCISIK                     | 0.98 | 0.13 |
| 157 | CADMCSLSR                      | 0.98 | 0.01 |
| 158 | SSKHSSR                        | 0.98 | 0.03 |
| 159 | MTLGCGSRKGGFLSHSR              | 0.98 | 0.00 |
| 160 | NYHLKMHSLTHSGLK                | 0.98 | 0.00 |
| 161 | VSQVMKMYEDCLK                  | 0.98 | 0.00 |
| 162 | NFIMSGSTATCGCR                 | 0.98 | 0.02 |
| 163 | SASSCGK                        | 0.98 | 0.02 |
| 164 | MHTGENSLDCEICGK                | 0.98 | 0.01 |
| 165 | PLETVLGR                       | 0.98 | 0.19 |
| 166 | IISLTPLGR                      | 0.98 | 0.09 |
| 167 | MSIPLGSLGFMK                   | 0.98 | 0.09 |
| 168 | LSKVYQVYKRGMALCGGELK           | 0.98 | 0.02 |
| 169 | KVYKEIEEVVGTER                 | 0.98 | 0.02 |
| 170 | YSCSHNSK                       | 0.98 | 0.01 |
| 171 | RKAFCEK                        | 0.98 | 0.07 |
| 172 | MFCMTDDR                       | 0.98 | 0.02 |
| 173 | KTVEACIK                       | 0.98 | 0.00 |
| 174 | SQINKVARDLNLEANK               | 0.98 | 0.02 |
| 175 | NEKNTHVICMTNYSLIMNRLTK         | 0.98 | 0.01 |
| 176 | DSREMRSDTCFTNR                 | 0.98 | 0.01 |
| 177 | LNMMNXKPLLPGVFYG               | 0.98 | 0.01 |
| 178 | QPVEDPFIWIGQTFSTLYFMYFMLSPISSK | 0.98 | 0.00 |
| 179 | LAECVDSTPR                     | 0.98 | 0.03 |
| 180 | KGYRCHCGK                      | 0.98 | 0.13 |
| 181 | NGCLCCSVK                      | 0.98 | 0.03 |
| 182 | RAGNQCLK                       | 0.98 | 0.01 |
| 183 | MDPLIARCCK                     | 0.98 | 0.15 |
| 184 | SDALDMR                        | 0.98 | 0.04 |

|     |                                   |      |      |
|-----|-----------------------------------|------|------|
| 185 | DAALHMK                           | 0.98 | 0.00 |
| 186 | DAALHMK                           | 0.98 | 0.00 |
| 187 | EMALVSEQREADALEFKR                | 0.98 | 0.00 |
| 188 | KCLKICSPHR                        | 0.98 | 0.01 |
| 189 | QMIMKIHLAYLQHYEHIYEQSATNPVQCLSLIK | 0.98 | 0.00 |
| 190 | QCQPMDYSDPNALR                    | 0.98 | 0.01 |
| 191 | IMGNRQHHCR                        | 0.98 | 0.12 |
| 192 | LTSALCQSFQRQMPDIGR                | 0.98 | 0.01 |
| 193 | TWFQMCCQDISSAVR                   | 0.98 | 0.13 |
| 194 | CRHHDVHECKKMAEK                   | 0.98 | 0.05 |
| 195 | GIANCNAESSK                       | 0.98 | 0.00 |
| 196 | PAETNRRKTCNEVMK                   | 0.98 | 0.00 |
| 197 | TITYKVHSMESR                      | 0.98 | 0.01 |
| 198 | SVNHERMKQCLIK                     | 0.98 | 0.00 |
| 199 | METKTEGLCTR                       | 0.98 | 0.00 |
| 200 | MMKMSKVIQDKICYR                   | 0.98 | 0.00 |
| 201 | VRNLMLCK                          | 0.98 | 0.07 |
| 202 | PGNYCRR                           | 0.98 | 0.02 |
| 203 | MIYCHLGIGK                        | 0.98 | 0.01 |
| 204 | KARQSCRFDSSIGK                    | 0.98 | 0.02 |
| 205 | SMLCLDSNSVSEK                     | 0.98 | 0.06 |
| 206 | LCLAQISNTLLK                      | 0.98 | 0.02 |
| 207 | YTPCGLAWR                         | 0.98 | 0.05 |
| 208 | VCHPNVAKR                         | 0.98 | 0.02 |
| 209 | MLPNYCIK                          | 0.98 | 0.01 |
| 210 | LSCKSMGAAKYR                      | 0.98 | 0.00 |
| 211 | GAECKCPRGQALNGTK                  | 0.98 | 0.01 |
| 212 | RSHTIDNCLK                        | 0.98 | 0.01 |
| 213 | SAQSLVDCK                         | 0.98 | 0.22 |
| 214 | HMPMNSGCRKGK                      | 0.98 | 0.01 |
| 215 | AFCLPTVSGK                        | 0.98 | 0.00 |
| 216 | PCFWLKHNMESDSYK                   | 0.98 | 0.02 |
| 217 | CMHNGQERQGIFRTECNICVCLK           | 0.98 | 0.02 |
| 218 | QMMCSASDDR                        | 0.98 | 0.00 |
| 219 | LGISCAK                           | 0.98 | 0.04 |
| 220 | GHENNCPMLQSSTK                    | 0.98 | 0.00 |
| 221 | GCGSNGR                           | 0.98 | 0.05 |
| 222 | MFCADHK                           | 0.98 | 0.05 |
| 223 | SPAKSCEKTLTR                      | 0.98 | 0.00 |
| 224 | NRMSCSTVIQDRK                     | 0.98 | 0.01 |
| 225 | HYTDAYK                           | 0.98 | 0.29 |
| 226 | MESREYK                           | 0.98 | 0.04 |
| 227 | RISTGCMK                          | 0.98 | 0.03 |
| 228 | KFGASLVCCIPECCK                   | 0.98 | 0.01 |
| 229 | TMTSCFKSPR                        | 0.98 | 0.04 |
| 230 | AVMKCENTPDGK                      | 0.98 | 0.02 |
| 231 | SIECAHK                           | 0.98 | 0.06 |

|     |                                      |      |      |
|-----|--------------------------------------|------|------|
| 232 | VPVQQMSTSSNSDWSRSR                   | 0.98 | 0.02 |
| 233 | PGSCQDRSR                            | 0.98 | 0.02 |
| 234 | LSGTPAFNDFCSALPSSHITAISFDGCQLADEDLVP | 0.98 | 0.01 |
| 235 | DFADINKYNWSLLKK                      | 0.98 | 0.07 |
| 236 | KKAIKYTALFTGK                        | 0.98 | 0.05 |
| 237 | RSNHDP SHEDYK                        | 0.98 | 0.02 |
| 238 | KTGAHNLCYKDPQMLK                     | 0.98 | 0.01 |
| 239 | MVMIWSIFICNK                         | 0.97 | 0.01 |
| 240 | FNLGMLFNFMK                          | 0.97 | 0.03 |
| 241 | NSLQPD CSDIR                         | 0.97 | 0.08 |
| 242 | QPDYKNFK                             | 0.97 | 0.02 |
| 243 | AQAERAK                              | 0.97 | 0.00 |
| 244 | PQARTNSRDR                           | 0.97 | 0.05 |
| 245 | NITKIFCNK                            | 0.97 | 0.01 |
| 246 | SCDNSSTGNGNR                         | 0.97 | 0.00 |
| 247 | NGANVNNSTATNSTPLR                    | 0.97 | 0.00 |
| 248 | GHCGNPGNEAADR                        | 0.97 | 0.08 |
| 249 | AESDYRR                              | 0.97 | 0.04 |
| 250 | ETDYRK KESMK                         | 0.97 | 0.02 |
| 251 | CRETNAEVALK                          | 0.97 | 0.02 |
| 252 | KNAAEGAKQTGCDRK                      | 0.97 | 0.00 |
| 253 | INSLVCWDWR                           | 0.97 | 0.07 |
| 254 | DPQARISTLCK                          | 0.97 | 0.05 |
| 255 | PMERCKISAQK                          | 0.97 | 0.02 |
| 256 | MKVILVCTSK                           | 0.97 | 0.07 |
| 257 | SLLTQDKC                             | 0.97 | 0.05 |
| 258 | MKFLPLLCVGIVFAANHHLTDQISTMIIGNMDK    | 0.97 | 0.04 |
| 259 | MCTIRMSFAK                           | 0.97 | 0.01 |
| 260 | DSNHTTPTK                            | 0.97 | 0.00 |
| 261 | GGGGEGR                              | 0.97 | 0.34 |
| 262 | IRPLMGGSGGGMQRPGPYDR                 | 0.97 | 0.04 |
| 263 | NHKSATAMSICK                         | 0.97 | 0.02 |
| 264 | IMIDFASRDCQVEFYEQMEK                 | 0.97 | 0.00 |
| 265 | LSDDFYQMKADFERRK                     | 0.97 | 0.00 |
| 266 | KQYSMNICHDGHTXQK                     | 0.97 | 0.03 |
| 267 | KSPSIPDK                             | 0.97 | 0.02 |
| 268 | RILIKNCTQK                           | 0.97 | 0.01 |
| 269 | PDTTMVEK                             | 0.97 | 0.00 |
| 270 | YMSPDSHKIHR                          | 0.97 | 0.00 |
| 271 | QPDDTVLK                             | 0.97 | 0.00 |
| 272 | EKCPYGF SCTDTWK                      | 0.97 | 0.03 |
| 273 | QCVQPPLK                             | 0.97 | 0.00 |
| 274 | NACSF SFDTVHFICDQETPLRTGLR           | 0.97 | 0.01 |
| 275 | MFCYNGTAGQNRGCR                      | 0.97 | 0.00 |
| 276 | MSAIMDIK                             | 0.97 | 0.00 |
| 277 | MPQCQEYLSK                           | 0.97 | 0.00 |
| 278 | SSITSCKSLDK                          | 0.97 | 0.03 |

|     |                                 |      |      |
|-----|---------------------------------|------|------|
| 279 | RAAMSTACTLKGR                   | 0.97 | 0.00 |
| 280 | CASMIQR                         | 0.97 | 0.03 |
| 281 | QVSLSNGLLVFMFLNFQRR             | 0.97 | 0.02 |
| 282 | LVNSQRPASLLDLVNVGLTSIR          | 0.97 | 0.02 |
| 283 | TFNCHVK                         | 0.97 | 0.01 |
| 284 | TPACGKPCGKITK                   | 0.97 | 0.01 |
| 285 | TKIIWGCK                        | 0.97 | 0.04 |
| 286 | LFCKSQVMIK                      | 0.97 | 0.03 |
| 287 | GQFSNVSLGK                      | 0.97 | 0.02 |
| 288 | GSLHDSCLIHK                     | 0.97 | 0.00 |
| 289 | IFIDCKGK                        | 0.97 | 0.03 |
| 290 | VIHGAKLKSEDCK                   | 0.97 | 0.01 |
| 291 | REPYCVEKQEMIR                   | 0.97 | 0.03 |
| 292 | QRIVCPHQEGK                     | 0.97 | 0.00 |
| 293 | RITDELQQR                       | 0.97 | 0.00 |
| 294 | RCHRNADCQLDDNGDRK               | 0.97 | 0.00 |
| 295 | QLEVLNMCMTK                     | 0.97 | 0.00 |
| 296 | SHTGEKPYRCMCEK                  | 0.97 | 0.00 |
| 297 | MAMSTRCAIARSK                   | 0.97 | 0.01 |
| 298 | RCSDDTGATCSNR                   | 0.97 | 0.00 |
| 299 | SHTGEKPYLCSVCSK                 | 0.97 | 0.00 |
| 300 | IGLCNGTRLTMKKMMLK               | 0.97 | 0.00 |
| 301 | PTCATKSQSSVR                    | 0.97 | 0.01 |
| 302 | LVIMNCPHPTVLSK                  | 0.97 | 0.00 |
| 303 | RVHYSCIK                        | 0.97 | 0.00 |
| 304 | KRYLGPLEKNK                     | 0.97 | 0.26 |
| 305 | ADVMPGK                         | 0.97 | 0.19 |
| 306 | ILGPLIVDPSPDVR                  | 0.97 | 0.14 |
| 307 | PLGGSAG                         | 0.97 | 0.11 |
| 308 | LGAEIEAEKHNGERMGPLMR            | 0.97 | 0.10 |
| 309 | FELSEPLGAK                      | 0.97 | 0.09 |
| 310 | PLGPSGGTASAIDMSR                | 0.97 | 0.08 |
| 311 | VCPHPLGELVAYCGTGEVVIMSDNGDPLYSR | 0.97 | 0.07 |
| 312 | LGRALKPLGSMPVTK                 | 0.97 | 0.04 |
| 313 | GEGCGMVILK                      | 0.97 | 0.03 |
| 314 | RKVYAMADARHEAK                  | 0.97 | 0.03 |
| 315 | IKIYKLDITMHPLGKTSK              | 0.97 | 0.02 |
| 316 | TAVMKTDSRSR                     | 0.97 | 0.02 |
| 317 | QMFKMCVTKDIQR                   | 0.97 | 0.00 |
| 318 | LCPECQMVVNKELSK                 | 0.97 | 0.02 |
| 319 | VTGCIPN                         | 0.97 | 0.05 |
| 320 | LSSAVCQATDKK                    | 0.97 | 0.02 |
| 321 | MKPTCEGSFDR                     | 0.97 | 0.01 |
| 322 | SGGSCSK                         | 0.97 | 0.00 |
| 323 | TYNLSGKGCPK                     | 0.97 | 0.00 |
| 324 | EIILDTLHFCDMR                   | 0.97 | 0.01 |
| 325 | ATNGDCEK                        | 0.97 | 0.00 |

|     |                       |      |      |
|-----|-----------------------|------|------|
| 326 | TKTPEDCER             | 0.97 | 0.00 |
| 327 | SNIFSSR               | 0.97 | 0.36 |
| 328 | EKFEKQEYKDLTEFMADFR   | 0.97 | 0.07 |
| 329 | RRHFSSR               | 0.97 | 0.04 |
| 330 | YFSHEMRFK             | 0.97 | 0.04 |
| 331 | MECGIESVWNNR          | 0.97 | 0.04 |
| 332 | IYFSEASK              | 0.97 | 0.01 |
| 333 | GKNIEHDLKNNFVR        | 0.97 | 0.00 |
| 334 | AACSGEKMDR            | 0.97 | 0.00 |
| 335 | PMTECIMKLILAK         | 0.97 | 0.03 |
| 336 | ATCNDGLMTK            | 0.97 | 0.00 |
| 337 | RIPKQLMCCELEGGR       | 0.97 | 0.08 |
| 338 | IHTGEKPYVCEFCCK       | 0.97 | 0.02 |
| 339 | HDLILTNTFETATYCNFCGKK | 0.97 | 0.01 |
| 340 | TINNAYTKVSIK          | 0.97 | 0.00 |
| 341 | RINAAYSAAK            | 0.97 | 0.00 |
| 342 | NVSIAPDDGACK          | 0.97 | 0.03 |
| 343 | QKIEICSADQSCETK       | 0.97 | 0.00 |
| 344 | KWNERGRMNQMCTAR       | 0.97 | 0.00 |
| 345 | QCFEDNSVPDVRATWGR     | 0.97 | 0.00 |
| 346 | KARFNHR               | 0.97 | 0.09 |
| 347 | HLGELKAR              | 0.97 | 0.03 |
| 348 | VNAICKRLIK            | 0.97 | 0.02 |
| 349 | IKSASDKTRHCQSLK       | 0.97 | 0.01 |
| 350 | FEALNLSFQNMCKXK       | 0.97 | 0.04 |
| 351 | PATIDCYKNLRMVSLGDSNVR | 0.97 | 0.01 |
| 352 | LYTFVCCRKPDR          | 0.97 | 0.00 |
| 353 | ESELKKTDAQYK          | 0.97 | 0.01 |
| 354 | LIESTYK               | 0.97 | 0.00 |
| 355 | VMMRYKDSDK            | 0.97 | 0.00 |
| 356 | AKDSISYK              | 0.97 | 0.00 |
| 357 | LPATYKSK              | 0.97 | 0.00 |
| 358 | NGHDALR               | 0.96 | 0.04 |
| 359 | QDADALSLSMK           | 0.96 | 0.01 |
| 360 | MKSTADALK             | 0.96 | 0.01 |
| 361 | SAAYIDALR             | 0.96 | 0.00 |
| 362 | PGAMCLNRLHNEAYER      | 0.96 | 0.01 |
| 363 | GYVCLER               | 0.96 | 0.00 |
| 364 | IYVCLDLTAQSSTK        | 0.96 | 0.00 |
| 365 | AEVTEAMVCLLK          | 0.96 | 0.00 |
| 366 | VTPGCDSVNK            | 0.96 | 0.01 |
| 367 | SPMHESRCGGAVEKK       | 0.96 | 0.01 |
| 368 | AIHLCISNQTGK          | 0.96 | 0.00 |
| 369 | PIQNTFPEIMAQCM        | 0.96 | 0.01 |
| 370 | QSCKTTLEDNLGRQP       | 0.96 | 0.01 |
| 371 | DGKSLYCMSNR           | 0.96 | 0.01 |
| 372 | DLTVGRVRRVMLK         | 0.96 | 0.00 |



|     |                           |      |      |
|-----|---------------------------|------|------|
| 373 | NQHICAGELVDNGK            | 0.96 | 0.02 |
| 374 | VGNGGCSQECVSDR            | 0.96 | 0.01 |
| 375 | VVDCKCVYEK                | 0.96 | 0.10 |
| 376 | DVNMCAEMLWIDTMR           | 0.96 | 0.02 |
| 377 | INISTLIQLSSETQGCR         | 0.96 | 0.01 |
| 378 | YLSDFLMCATK               | 0.96 | 0.01 |
| 379 | YDVCGIGLIK                | 0.96 | 0.01 |
| 380 | ITECDGGK                  | 0.96 | 0.01 |
| 381 | RNPNQMCPSMPRR             | 0.96 | 0.02 |
| 382 | FHPLDACHFEVMR             | 0.96 | 0.02 |
| 383 | GDTYLCVSATSDK             | 0.96 | 0.00 |
| 384 | VSGTYVATTKYTKK            | 0.96 | 0.13 |
| 385 | EGTKKLAQASKYK             | 0.96 | 0.07 |
| 386 | EEGVILSKYKKQLK            | 0.96 | 0.05 |
| 387 | MTDNKKK                   | 0.96 | 0.03 |
| 388 | CPMCTFVAK                 | 0.96 | 0.02 |
| 389 | IDXKKKDIEK                | 0.96 | 0.01 |
| 390 | DSAPEMACLLGK              | 0.96 | 0.01 |
| 391 | LDSPKKKMHNR               | 0.96 | 0.01 |
| 392 | KKKASSIYGK                | 0.96 | 0.01 |
| 393 | CRDLSSQTKKK               | 0.96 | 0.00 |
| 394 | SLSMSNETKKK               | 0.96 | 0.00 |
| 395 | WLPTESSEMSSTSER           | 0.96 | 0.00 |
| 396 | CTPVMIAAWK                | 0.96 | 0.00 |
| 397 | KELSFTDIETVSKMYGCADHCDR   | 0.96 | 0.03 |
| 398 | TELTSCGQSLGTLR            | 0.96 | 0.02 |
| 399 | RAECLEK                   | 0.96 | 0.04 |
| 400 | SCPITPRAK                 | 0.96 | 0.00 |
| 401 | TQDNMSRAQDK               | 0.96 | 0.00 |
| 402 | MGCGASKSK                 | 0.96 | 0.02 |
| 403 | AGIKPYQCDFCGEK            | 0.96 | 0.00 |
| 404 | PTCILLQEIK                | 0.96 | 0.00 |
| 405 | TLMLDGEGYSCNR             | 0.96 | 0.05 |
| 406 | QTSFNNNSCSSK              | 0.96 | 0.03 |
| 407 | LVPSTFLAAMKKGMSLMGEGICSMK | 0.96 | 0.01 |
| 408 | SSIPMSCSKRR               | 0.96 | 0.01 |
| 409 | DVEAETSCSPR               | 0.96 | 0.01 |
| 410 | APQFLAPLMDYVYR            | 0.96 | 0.00 |
| 411 | GCIKDIIHDSGR              | 0.96 | 0.00 |
| 412 | GNGTCMSGR                 | 0.96 | 0.00 |
| 413 | YEVEQLEKKDAMSCPACSK       | 0.96 | 0.01 |
| 414 | GSRSPACPR                 | 0.96 | 0.05 |
| 415 | MDCIQNAEGGK               | 0.96 | 0.01 |
| 416 | QWMSWQPCTGR               | 0.96 | 0.02 |
| 417 | NSNAMEPMGLIQCLSNMKK       | 0.96 | 0.01 |
| 418 | MSHYRKMKEK                | 0.96 | 0.00 |
| 419 | LCCKRASLTGMAGK            | 0.96 | 0.02 |

|     |                        |      |      |
|-----|------------------------|------|------|
| 420 | PADCNSPSKK             | 0.96 | 0.02 |
| 421 | ISAVLCTSGR             | 0.96 | 0.01 |
| 422 | CRTSNLLIMMNET          | 0.96 | 0.04 |
| 423 | DYQITMDGNTHR           | 0.96 | 0.00 |
| 424 | DITDYLMK               | 0.96 | 0.00 |
| 425 | LHCEINVMETVNDVK        | 0.96 | 0.23 |
| 426 | IGFTECELK              | 0.96 | 0.02 |
| 427 | AGQRGDQECESAMK         | 0.96 | 0.02 |
| 428 | SMLSKMKNQPSLCDIPK      | 0.96 | 0.01 |
| 429 | DLCDGYMGK              | 0.96 | 0.00 |
| 430 | LKKGKVATCQR            | 0.96 | 0.00 |
| 431 | LAPKVLDGTRCK           | 0.96 | 0.01 |
| 432 | NRAFTDIEKACQR          | 0.96 | 0.00 |
| 433 | RCLLNDSNKDTVRK         | 0.96 | 0.01 |
| 434 | GQCEFITDLKTTSLRK       | 0.96 | 0.00 |
| 435 | PDLMGFHQCPQLR          | 0.96 | 0.00 |
| 436 | THDRQFKFDICK           | 0.96 | 0.06 |
| 437 | NEGGEKK                | 0.96 | 0.03 |
| 438 | MGGGRVGMGGMGMPMGRGGR   | 0.96 | 0.02 |
| 439 | LACYTIEIYGTINK         | 0.96 | 0.00 |
| 440 | MIDGKCVDFDECAMR        | 0.96 | 0.02 |
| 441 | NDSPCGSTIGPIMSAK       | 0.96 | 0.02 |
| 442 | SIPDIETDK              | 0.96 | 0.02 |
| 443 | PDIRSTKKMK             | 0.96 | 0.02 |
| 444 | IPDLDAK                | 0.96 | 0.02 |
| 445 | SKKGHPD                | 0.96 | 0.01 |
| 446 | NPDIMAGEK              | 0.96 | 0.01 |
| 447 | KAPDGSK                | 0.96 | 0.01 |
| 448 | PDRIAR                 | 0.96 | 0.01 |
| 449 | DIDMSPDQMK             | 0.96 | 0.01 |
| 450 | GKIPDGLR               | 0.96 | 0.01 |
| 451 | RVLRRMGYCTASDVIELK     | 0.96 | 0.01 |
| 452 | GKGIPDLR               | 0.96 | 0.00 |
| 453 | FIPDGYLGITKEEAVTFPDGSR | 0.96 | 0.00 |
| 454 | WPDESKMCLNESQKR        | 0.96 | 0.00 |
| 455 | KFNSYKCNHDLSSK         | 0.96 | 0.01 |
| 456 | QCQMATGQNDKK           | 0.96 | 0.02 |
| 457 | RQNGGQTILCSRSPDK       | 0.96 | 0.00 |
| 458 | GYCMIESGEGSSR          | 0.96 | 0.02 |
| 459 | QVELCENGSGK            | 0.96 | 0.00 |
| 460 | SFPCFDEPDMKAMFK        | 0.96 | 0.02 |
| 461 | PRGILLVDMR             | 0.96 | 0.06 |
| 462 | LAGCLSVLNPNIALLRK      | 0.96 | 0.02 |
| 463 | PRSGGNKKSCR            | 0.96 | 0.02 |
| 464 | LRLTCRKAAGK            | 0.96 | 0.00 |
| 465 | RCRHKAVYLNEAGR         | 0.96 | 0.03 |
| 466 | PAGETVMIDIC            | 0.96 | 0.01 |

|     |                      |      |      |
|-----|----------------------|------|------|
| 467 | NVDSLMAFCHLHMQPR     | 0.96 | 0.01 |
| 468 | FAEMCNIIER           | 0.96 | 0.00 |
| 469 | KAILGCLKQAVQR        | 0.96 | 0.01 |
| 470 | DICETSRMTITGDLK      | 0.96 | 0.00 |
| 471 | GGRKILNSTTSMQACR     | 0.96 | 0.00 |
| 472 | LKERLACLGDNIAR       | 0.96 | 0.01 |
| 473 | LNCQRATNSQNIIQEAMSLR | 0.96 | 0.00 |
| 474 | ACDGHGK              | 0.96 | 0.00 |
| 475 | YKVLQQMVGCR          | 0.96 | 0.40 |
| 476 | LAQECKSHFEKQSNK      | 0.96 | 0.08 |
| 477 | LSMCSFFK             | 0.96 | 0.00 |
| 478 | KAQHFAAECR           | 0.96 | 0.01 |
| 479 | KGDDTVALTDMSDQCR     | 0.96 | 0.00 |
| 480 | NPPDQDPNAMTPSK       | 0.95 | 0.00 |
| 481 | PNSPLGHSSIQGKR       | 0.95 | 0.14 |
| 482 | TPLLGDQMERLR         | 0.95 | 0.10 |
| 483 | TGKPPLGEVVIAYK       | 0.95 | 0.08 |
| 484 | VKNSGFKLPLGTR        | 0.95 | 0.07 |
| 485 | LLPLMLGAIDMSFPR      | 0.95 | 0.07 |
| 486 | YFRGHHSPSR           | 0.95 | 0.07 |
| 487 | LGGHAMPVTLPLMKK      | 0.95 | 0.06 |
| 488 | ISIMSDIPTNKPLGILK    | 0.95 | 0.04 |
| 489 | KVIDSNEMDKVMSILR     | 0.95 | 0.00 |
| 490 | LTGNNWNLVACNK        | 0.95 | 0.00 |
| 491 | SPQDLVLLMHCIER       | 0.95 | 0.11 |
| 492 | NCSSELLMFRK          | 0.95 | 0.10 |
| 493 | NMRYKNLAR            | 0.95 | 0.10 |
| 494 | SNSELTSNVTYK         | 0.95 | 0.03 |
| 495 | ILKTRYK              | 0.95 | 0.02 |
| 496 | PWSHNYK              | 0.95 | 0.01 |
| 497 | VYMEYKNLAEHLTDPR     | 0.95 | 0.00 |
| 498 | LIIEQYK              | 0.95 | 0.00 |
| 499 | LHYKTDWHR            | 0.95 | 0.00 |
| 500 | KAFLHWYT             | 0.95 | 0.46 |
| 501 | TGESVSEKGCMGK        | 0.95 | 0.01 |
| 502 | PWGIANDMTCSIR        | 0.95 | 0.01 |
| 503 | FTCSDDGTVR           | 0.95 | 0.00 |
| 504 | LGGADNYKLCR          | 0.95 | 0.00 |
| 505 | NMDEMAFCSKK          | 0.95 | 0.03 |
| 506 | ALLKAACERHAK         | 0.95 | 0.00 |
| 507 | CVLLDNK              | 0.95 | 0.12 |
| 508 | ALEDAQKNYTRTAKELNR   | 0.95 | 0.08 |
| 509 | SANAFSFFVFSRK        | 0.95 | 0.06 |
| 510 | PGNRVILK             | 0.95 | 0.00 |
| 511 | SPGASALKICR          | 0.95 | 0.00 |
| 512 | WASTFCQQTSYVIR       | 0.95 | 0.01 |
| 513 | FCQSQUERYLNMKMSK     | 0.95 | 0.01 |

|     |                                     |      |      |
|-----|-------------------------------------|------|------|
| 514 | VPLIMGILSCTK                        | 0.95 | 0.01 |
| 515 | FVISTCTQMK                          | 0.95 | 0.03 |
| 516 | LKYDPGLEGIDEDKK                     | 0.95 | 0.07 |
| 517 | VKTAKYTVLKK                         | 0.95 | 0.05 |
| 518 | SSEVAEDTSTSSR                       | 0.95 | 0.02 |
| 519 | KTLEGMKKK                           | 0.95 | 0.01 |
| 520 | FLRIDSPATKKK                        | 0.95 | 0.00 |
| 521 | IGCTGMHPVK                          | 0.95 | 0.01 |
| 522 | SMLLASSVIAHGNNRMMGSRNCR             | 0.95 | 0.03 |
| 523 | RIQLCELVDPERK                       | 0.95 | 0.00 |
| 524 | RVCDDAEAILNHR                       | 0.95 | 0.00 |
| 525 | SRLAGMDEDVHFTENCR                   | 0.95 | 0.00 |
| 526 | LKESCDSPIQCSETTANSTCNETGVCQCIEDSISK | 0.95 | 0.02 |
| 527 | MSGNRCSPTEMRLGK                     | 0.95 | 0.00 |
| 528 | PSIKTVNCNGFK                        | 0.95 | 0.00 |
| 529 | VNNLLDEPGMDCRSS                     | 0.95 | 0.00 |
| 530 | LLKKSNYLMCPK                        | 0.95 | 0.00 |
| 531 | LASIKAR                             | 0.95 | 0.03 |
| 532 | FRCYSASLQGSELPNPK                   | 0.95 | 0.02 |
| 533 | NPTSDTNFSNSEAGK                     | 0.95 | 0.00 |
| 534 | SNSPAAETNR                          | 0.95 | 0.00 |
| 535 | AQIDVCSFYDR                         | 0.95 | 0.01 |
| 536 | DALQETNESDLLMNK                     | 0.95 | 0.01 |
| 537 | ALDYIASK                            | 0.95 | 0.00 |
| 538 | LSMSSDSYSEK                         | 0.95 | 0.00 |
| 539 | DYEKIGR                             | 0.95 | 0.00 |
| 540 | HTLSDDYEK                           | 0.95 | 0.00 |
| 541 | PSVITCAPMATER                       | 0.95 | 0.01 |
| 542 | AEIKQWYKGFMR                        | 0.95 | 0.25 |
| 543 | DPTGLTSAASRESR                      | 0.95 | 0.00 |
| 544 | CLMEQNVEER                          | 0.95 | 0.00 |
| 545 | CLAASEGAK                           | 0.95 | 0.00 |
| 546 | PTSASGHAALIYGCPFCGVR                | 0.95 | 0.01 |
| 547 | TGCIQAGLRGK                         | 0.95 | 0.01 |
| 548 | RASDGGANIHCQR                       | 0.95 | 0.08 |
| 549 | CCSLEHLRTDCKTSLKCSECNSTSHMTAMHMSK   | 0.95 | 0.00 |
| 550 | GGEESGGDGRLSRGNCR                   | 0.95 | 0.02 |
| 551 | NLTKPDFLR                           | 0.95 | 0.01 |
| 552 | LTFSPDVTSIK                         | 0.95 | 0.00 |
| 553 | WEMLKRAETACFR                       | 0.94 | 0.04 |
| 554 | LIPLCGNGIVER                        | 0.94 | 0.02 |
| 555 | SAREILCAMGR                         | 0.94 | 0.01 |
| 556 | PKVGDLCAAK                          | 0.94 | 0.01 |
| 557 | MSATGEGMKLAGFSALTFVAADDGTDSS        | 0.94 | 0.01 |
| 558 | DARCVVESNGK                         | 0.94 | 0.01 |
| 559 | IRTRRCQMAGK                         | 0.94 | 0.00 |
| 560 | QFEMIDGHLCEK                        | 0.94 | 0.00 |

|     |                                |      |      |
|-----|--------------------------------|------|------|
| 561 | VTWTKTLSFLLYK                  | 0.94 | 0.03 |
| 562 | CGNNPLIGR                      | 0.94 | 0.01 |
| 563 | LLVEPSMTHLAHIPDRSDRVTGNSLSLLER | 0.94 | 0.01 |
| 564 | ENTMNYKTIVTPKK                 | 0.94 | 0.02 |
| 565 | LYKTFKDRK                      | 0.94 | 0.00 |
| 566 | LSEKELIGTYK                    | 0.94 | 0.00 |
| 567 | NPGGTVLSYK                     | 0.94 | 0.00 |
| 568 | DPGAINITHMSSYK                 | 0.94 | 0.00 |
| 569 | SANSIMRIDKSYK                  | 0.94 | 0.00 |
| 570 | PEDATTASQVAEMYK                | 0.94 | 0.00 |
| 571 | GGDIGAVYK                      | 0.94 | 0.00 |
| 572 | EICDLADKHK                     | 0.94 | 0.02 |
| 573 | KCVMGGEFEAALLK                 | 0.94 | 0.01 |
| 574 | MYIKHVQDMCIHWGR                | 0.94 | 0.00 |
| 575 | PIFDTVCMLGVHR                  | 0.94 | 0.01 |
| 576 | CMESGGLSMMIR                   | 0.94 | 0.00 |
| 577 | TGSIHSGKDSR                    | 0.94 | 0.00 |
| 578 | VAMRTDANELTNPHSKSR             | 0.94 | 0.00 |
| 579 | SLSPVMCSIVR                    | 0.94 | 0.00 |
| 580 | YENKDKMKSNTIIVPCK              | 0.94 | 0.03 |
| 581 | DTEILCKTGLYR                   | 0.94 | 0.02 |
| 582 | CSIEIGMK                       | 0.94 | 0.00 |
| 583 | MGANGLLCHVIK                   | 0.94 | 0.00 |
| 584 | LCHEVTLVAIKDGQER               | 0.94 | 0.00 |
| 585 | GIVPITCGELFK                   | 0.94 | 0.01 |
| 586 | HVLTASHCFAEGTHAIR              | 0.94 | 0.13 |
| 587 | PLEIPTAEESISTMLGK              | 0.94 | 0.07 |
| 588 | APLATSTGSIDSLGNHLTFK           | 0.94 | 0.05 |
| 589 | LPMLNPDLGASPLK                 | 0.94 | 0.05 |
| 590 | LGLLEPLSKEHK                   | 0.94 | 0.04 |
| 591 | KTSITPLQPMSSARCALGAVELDGK      | 0.94 | 0.02 |
| 592 | ASEPLIKLNCMDK                  | 0.94 | 0.00 |
| 593 | EKLIFQIGTCDAK                  | 0.94 | 0.00 |
| 594 | MCQGFTTANNK                    | 0.94 | 0.00 |
| 595 | NSVASHEAGVSSATKKK              | 0.94 | 0.00 |
| 596 | AGATKKPKK                      | 0.94 | 0.00 |
| 597 | GMSSTQKKNPLAMLKK               | 0.94 | 0.00 |
| 598 | ISHDKYTMNWHYHR                 | 0.94 | 0.44 |
| 599 | GSNGIIR                        | 0.94 | 0.07 |
| 600 | FNYEYDNL                       | 0.94 | 0.02 |
| 601 | STVQESTGCSPNRIMLGR             | 0.94 | 0.00 |
| 602 | DNYGGDLDALMKNK                 | 0.94 | 0.03 |
| 603 | LESTRHSKNFMSDKNESK             | 0.94 | 0.01 |
| 604 | FSRAGGK                        | 0.94 | 0.00 |
| 605 | TEDCSDGLDEK                    | 0.94 | 0.00 |
| 606 | ANDAINMYTMCLEHIK               | 0.94 | 0.00 |
| 607 | MDPSADITC                      | 0.94 | 0.01 |

|     |                      |      |      |
|-----|----------------------|------|------|
| 608 | KIDPGYCDIFSPELAMPTR  | 0.94 | 0.01 |
| 609 | EVKDTYMLQVIAKDGGSPMK | 0.94 | 0.00 |
| 610 | LVGLLDLKAGKDYVR      | 0.94 | 0.00 |
| 611 | TGEMRVIK             | 0.94 | 0.00 |
| 612 | GLCSPGMAFD TAR       | 0.94 | 0.00 |
| 613 | NGSDVTYARAASNCR      | 0.94 | 0.00 |
| 614 | NIQMFLTNSR           | 0.94 | 0.09 |
| 615 | SNSGTNKTDGKAK        | 0.94 | 0.00 |
| 616 | YLVSIISHK            | 0.94 | 0.00 |
| 617 | VAVSHLQK             | 0.94 | 0.00 |
| 618 | CRNMPQGSELRVPGK      | 0.94 | 0.00 |
| 619 | DILSCLEADPTKR        | 0.94 | 0.00 |
| 620 | ATFAEKSAVCGR         | 0.94 | 0.01 |
| 621 | CVVNGHTYCKMGLTGR     | 0.94 | 0.02 |
| 622 | TKNQIDYIMINK         | 0.94 | 0.01 |
| 623 | CHGGNVELK            | 0.94 | 0.01 |
| 624 | LNDYEERKR            | 0.94 | 0.00 |
| 625 | DDYEAIK              | 0.94 | 0.00 |
| 626 | DYVAYIK              | 0.94 | 0.00 |
| 627 | GQMSTADAEDYIK        | 0.94 | 0.00 |
| 628 | CHDPASYMKIGK         | 0.94 | 0.00 |
| 629 | GDYISKLK             | 0.94 | 0.00 |
| 630 | HCDFSANTLGYMK        | 0.94 | 0.11 |
| 631 | KMFDAKISEMEEICK      | 0.94 | 0.00 |
| 632 | CLPVNHSGHVTGR        | 0.94 | 0.00 |
| 633 | VLSVRHVTMCDIMKR      | 0.93 | 0.00 |
| 634 | LPASITAMEAIDYKPK     | 0.93 | 0.00 |
| 635 | VKECLEK              | 0.93 | 0.05 |
| 636 | SASDTCGMFGLSK        | 0.93 | 0.01 |
| 637 | GGEHQGRGGREWDDRGR    | 0.93 | 0.07 |
| 638 | KATLETVHAR           | 0.93 | 0.06 |
| 639 | KAARHGK              | 0.93 | 0.01 |
| 640 | SAALIQQCTAVKNK       | 0.93 | 0.00 |
| 641 | LVDVGCIQHFTR         | 0.93 | 0.04 |
| 642 | MPAYKLMNFDTKGR       | 0.93 | 0.01 |
| 643 | SALIKAISSNYK         | 0.93 | 0.01 |
| 644 | NGGISYK              | 0.93 | 0.00 |
| 645 | FEEAYKALVSDTK        | 0.93 | 0.00 |
| 646 | EQMGGIMYKLSNMK       | 0.93 | 0.00 |
| 647 | NTLVATYKGTK          | 0.93 | 0.00 |
| 648 | IEAYKDSVEGK          | 0.93 | 0.00 |
| 649 | AVDGSYVYK            | 0.93 | 0.00 |
| 650 | EVTDEDVYK            | 0.93 | 0.00 |
| 651 | NGDRVHVQWSDGAMYK     | 0.93 | 0.00 |
| 652 | SMTGETNIPDEDK        | 0.93 | 0.01 |
| 653 | SHGPDGK              | 0.93 | 0.00 |
| 654 | SXELPDGQVITIGNER     | 0.93 | 0.00 |

|     |                                     |      |      |
|-----|-------------------------------------|------|------|
| 655 | SFSHSPDLTAHK                        | 0.93 | 0.00 |
| 656 | KPDESTLEAK                          | 0.93 | 0.00 |
| 657 | RSSPPDSNRYDHRR                      | 0.93 | 0.00 |
| 658 | VEITDALK                            | 0.93 | 0.01 |
| 659 | ANCNSGFENVPGNPSR                    | 0.93 | 0.00 |
| 660 | SAIADIMKEER                         | 0.93 | 0.00 |
| 661 | IPGVSVEECARR                        | 0.93 | 0.01 |
| 662 | DGNLVDCDPANK                        | 0.93 | 0.00 |
| 663 | LIVMGDGASGKTSLCMR                   | 0.93 | 0.00 |
| 664 | LGVASRPSQQR                         | 0.93 | 0.02 |
| 665 | TANCQPVGK                           | 0.93 | 0.00 |
| 666 | LAIEGKVIQRAECRPVANDTYMK             | 0.93 | 0.01 |
| 667 | RHAIDWIPEKNILLIVK                   | 0.93 | 0.02 |
| 668 | CAKSAFAMTK                          | 0.93 | 0.02 |
| 669 | DIIDCFVR                            | 0.93 | 0.08 |
| 670 | LASQNGCVTVPK                        | 0.93 | 0.03 |
| 671 | HYGQFTCEXCKSFFK                     | 0.93 | 0.03 |
| 672 | ENEVREILSPSECSSR                    | 0.93 | 0.01 |
| 673 | CIMRGANLPSEIDDK                     | 0.93 | 0.01 |
| 674 | LGGQECTGESVK                        | 0.93 | 0.01 |
| 675 | CIAGKHNGHK                          | 0.93 | 0.00 |
| 676 | LNAQLCVVDSGK                        | 0.93 | 0.00 |
| 677 | TVFCDGCALGVR                        | 0.93 | 0.04 |
| 678 | CMSTQKWQR                           | 0.93 | 0.00 |
| 679 | ELTIMTRCQERGTPLFK                   | 0.93 | 0.00 |
| 680 | TKPQVQINCWVTSNGKGR                  | 0.93 | 0.00 |
| 681 | CSLSGIK                             | 0.93 | 0.00 |
| 682 | CSFTIQMWNYHLR                       | 0.93 | 0.00 |
| 683 | AQTTRAADAVR                         | 0.93 | 0.00 |
| 684 | LEVKTGMDLGPLIYK                     | 0.93 | 0.18 |
| 685 | GSSNPLGLNSNLDK                      | 0.93 | 0.13 |
| 686 | XWLVLMLGAPDMAFPR                    | 0.93 | 0.12 |
| 687 | TKFMNYSSTVVCTLGTSHPLEIETRDMFGNLTPYK | 0.93 | 0.07 |
| 688 | GMATALSMPLLGK                       | 0.93 | 0.02 |
| 689 | VYECMFKVLKDVELLDDR                  | 0.93 | 0.02 |
| 690 | LTLLSAQSHGCAGIEK                    | 0.93 | 0.02 |
| 691 | YNLPINTMWIQRDSCEDNKRFK              | 0.93 | 0.02 |
| 692 | KEDATCPVSEPGSTLGKIK                 | 0.93 | 0.00 |
| 693 | SFVSFLGK                            | 0.93 | 0.01 |
| 694 | ILTANEMACALFGYNR                    | 0.93 | 0.04 |
| 695 | NITLSGPTTFCPIIEK                    | 0.93 | 0.00 |
| 696 | KDYNLPKPKMTNSDLSR                   | 0.93 | 0.00 |
| 697 | YMSVCLLYRGDVISK                     | 0.93 | 0.00 |
| 698 | RFFSGCTIPR                          | 0.93 | 0.18 |
| 699 | MSTNSSDLYVR                         | 0.93 | 0.01 |
| 700 | EESSPAKISFLDAQR                     | 0.93 | 0.01 |
| 701 | IVSIATNSNNRQVERIMK                  | 0.93 | 0.00 |

|     |                             |      |      |
|-----|-----------------------------|------|------|
| 702 | KGIAMTVSHQQSMPK             | 0.93 | 0.00 |
| 703 | ICYVGIKTVK                  | 0.92 | 0.00 |
| 704 | SFSRRGALAIHK                | 0.92 | 0.01 |
| 705 | QSNAENKNTKNSNTEGK           | 0.92 | 0.00 |
| 706 | ALKLYVYNTDSDSCR             | 0.92 | 0.00 |
| 707 | DYTEDIQIDASSRYR             | 0.92 | 0.02 |
| 708 | PKFIDKFLLGASSLSRK           | 0.92 | 0.00 |
| 709 | KRGKESDYMIGR                | 0.92 | 0.00 |
| 710 | SGDYEEDMER                  | 0.92 | 0.00 |
| 711 | FTSCQAPLVTADDR              | 0.92 | 0.00 |
| 712 | LTAISLGQGGPRAEAMMR          | 0.92 | 0.02 |
| 713 | FFYIPFGQGPRICLGMRLLALLELK   | 0.92 | 0.01 |
| 714 | TGKMHRFAFCVK                | 0.92 | 0.00 |
| 715 | ICETSREVVAI GK              | 0.92 | 0.01 |
| 716 | RCFYRPLTPR                  | 0.92 | 0.00 |
| 717 | AVRGCQGVDLNR                | 0.92 | 0.05 |
| 718 | LCSVANKIQACYGFFSWKK         | 0.92 | 0.01 |
| 719 | FHFDDKLSYK                  | 0.92 | 0.02 |
| 720 | DRDEEREYKSSR                | 0.92 | 0.01 |
| 721 | GIQHKGYK                    | 0.92 | 0.00 |
| 722 | ASLRGDVDAYKMEK              | 0.92 | 0.00 |
| 723 | YKDIGKASMKNLPISSSK          | 0.92 | 0.00 |
| 724 | GPQLICSGSDDGTIK             | 0.92 | 0.00 |
| 725 | CSCFDTIFKGTYENG GIVR        | 0.92 | 0.01 |
| 726 | IKAGRELGLTFVPFPEG GGR       | 0.92 | 0.02 |
| 727 | YGPVCFVDMKSR                | 0.92 | 0.01 |
| 728 | LPDVRASSTRK                 | 0.92 | 0.03 |
| 729 | PRSPDPVEGR                  | 0.92 | 0.02 |
| 730 | LTYPDELGR                   | 0.92 | 0.01 |
| 731 | TAYEMAQSM D KRVSYICLINS     | 0.92 | 0.01 |
| 732 | VIEFPNPDK                   | 0.92 | 0.01 |
| 733 | GFHGDGYNSCTK                | 0.92 | 0.00 |
| 734 | MMYLSVPDMMGK                | 0.92 | 0.00 |
| 735 | EDPPDTSGIKMDR               | 0.92 | 0.00 |
| 736 | LAGPDLK                     | 0.92 | 0.00 |
| 737 | HLANGLPDFLMK                | 0.92 | 0.00 |
| 738 | TSPSSFGDDICQK               | 0.92 | 0.01 |
| 739 | DGLDIMLNSLC EMAGK           | 0.92 | 0.00 |
| 740 | LAILIRSR                    | 0.92 | 0.35 |
| 741 | ERSHSFSSPSLQK               | 0.92 | 0.02 |
| 742 | EMKMKKK                     | 0.92 | 0.10 |
| 743 | DALGAPK                     | 0.92 | 0.01 |
| 744 | DEDALRGLDPR                 | 0.92 | 0.01 |
| 745 | CPSGSQSSKSHMAR              | 0.92 | 0.01 |
| 746 | TLFPLYTDAQCDGLINDYESAVNKKGK | 0.92 | 0.00 |
| 747 | KENSGVEGCLLGK               | 0.92 | 0.01 |
| 748 | LMLKYCDIFGILDK              | 0.92 | 0.01 |



|     |                          |      |      |
|-----|--------------------------|------|------|
| 749 | VLVNRGGKSIQDECEQYITK     | 0.92 | 0.00 |
| 750 | QVTSKLEQALQHYDDA         | 0.92 | 0.00 |
| 751 | LNKGGMFGSYTPDRYK         | 0.92 | 0.00 |
| 752 | LVGMSTGNVSLKEHVHPDLACADK | 0.92 | 0.02 |
| 753 | MSCNFPHGAMDTHTFANMR      | 0.91 | 0.00 |
| 754 | AADDVGSCGMDRAK           | 0.91 | 0.01 |
| 755 | VKNQRMCFRTNGTK           | 0.91 | 0.04 |
| 756 | GGVPSMLRLASCPEKSR        | 0.91 | 0.00 |
| 757 | SLIRNSKTNK               | 0.91 | 0.02 |
| 758 | SSHVLLVMKG               | 0.91 | 0.01 |
| 759 | ILSLQAAHIVSHMIK          | 0.91 | 0.00 |
| 760 | PLGKKNEGFCSGK            | 0.91 | 0.07 |
| 761 | NPLGLVPVLEKD GK          | 0.91 | 0.05 |
| 762 | VQELGKNLGMEINR           | 0.91 | 0.01 |
| 763 | SPHATIDYLNK              | 0.91 | 0.00 |
| 764 | CRIGGASSFR               | 0.91 | 0.00 |
| 765 | ARGESSDYAWK              | 0.91 | 0.00 |
| 766 | TTDTIEVSKLNGDYRK         | 0.91 | 0.00 |
| 767 | PVDYPAGR                 | 0.91 | 0.00 |
| 768 | IVSTYKSRNDEFK            | 0.91 | 0.08 |
| 769 | IDSPLILYK                | 0.91 | 0.01 |
| 770 | VVLRSYK                  | 0.91 | 0.01 |
| 771 | VERAHRQISGAYK            | 0.91 | 0.00 |
| 772 | EPAQAYFKDQIYK            | 0.91 | 0.00 |
| 773 | VSGCEGARWR               | 0.91 | 0.02 |
| 774 | CLEMEKSIKASSDNEVTLR      | 0.91 | 0.00 |
| 775 | FKFSLSTSSR               | 0.91 | 0.00 |
| 776 | QLFPPTFSSLSR             | 0.91 | 0.00 |
| 777 | GDSVWKC VGLVK            | 0.91 | 0.03 |
| 778 | GWQPVNICITSAGDLLVTMR     | 0.91 | 0.01 |
| 779 | FHTCVSLLEG MVNPER        | 0.91 | 0.02 |
| 780 | NEGLKMMMSLIK             | 0.91 | 0.00 |
| 781 | GIPDPYLRER               | 0.91 | 0.01 |
| 782 | SIEQNMSMIGKMVIDMKDPDR    | 0.91 | 0.00 |
| 783 | TLISAPDDRPTSK            | 0.91 | 0.00 |
| 784 | PDLESGEASLNTTPR          | 0.91 | 0.00 |
| 785 | SADSKEPDSKTTK            | 0.91 | 0.00 |
| 786 | GKRPSCATLFAANK           | 0.91 | 0.00 |
| 787 | FAHCGVVAMR               | 0.91 | 0.14 |
| 788 | ALERAINKPSYTCTR          | 0.91 | 0.01 |
| 789 | SAIALEK                  | 0.91 | 0.02 |
| 790 | NMVDVSAIASIMPR           | 0.91 | 0.00 |
| 791 | LADITEPNAIGK             | 0.91 | 0.00 |
| 792 | YVLRNGGIRR               | 0.91 | 0.07 |
| 793 | ANMLGCISLSAR             | 0.91 | 0.02 |
| 794 | KSCSMKLVVK               | 0.91 | 0.02 |
| 795 | GGISLPVFRCAR             | 0.91 | 0.03 |

|     |                                     |      |      |
|-----|-------------------------------------|------|------|
| 796 | CGQKVAQATLLK                        | 0.91 | 0.01 |
| 797 | RCMGNAHQTLKVLSDLLGHDNTEIR           | 0.91 | 0.00 |
| 798 | LGCHSGFQTWVK                        | 0.90 | 0.03 |
| 799 | ERGKDKDSSSK                         | 0.90 | 0.00 |
| 800 | LLDDSTNENGSLKAR                     | 0.90 | 0.03 |
| 801 | LSPKAARKDR                          | 0.90 | 0.01 |
| 802 | CEAEMAGVDIK                         | 0.90 | 0.00 |
| 803 | IAYVLTWANSCQNSTVCSYYTPYKGHPGEKDFLK  | 0.90 | 0.01 |
| 804 | MGTKQSHIHKLDTVSKR                   | 0.90 | 0.00 |
| 805 | SLAALDATNR                          | 0.90 | 0.01 |
| 806 | NDSKMAVDAALR                        | 0.90 | 0.00 |
| 807 | EVVDMVCLNADK                        | 0.90 | 0.01 |
| 808 | SKIDYHKVNMEPLDK                     | 0.90 | 0.00 |
| 809 | PKEWTDHDYALQNSNESSK                 | 0.90 | 0.00 |
| 810 | KIDWIKGIDYRR                        | 0.90 | 0.00 |
| 811 | KFLEYKFGQGVVENPR                    | 0.90 | 0.00 |
| 812 | QYVEGLMSDYQK                        | 0.90 | 0.00 |
| 813 | HSMGHRNMTDYSHKSSK                   | 0.90 | 0.00 |
| 814 | NMDEPQRGDYVHAKIK                    | 0.90 | 0.00 |
| 815 | GDDYILNGQK                          | 0.90 | 0.00 |
| 816 | GRPIGSSFR                           | 0.90 | 0.03 |
| 817 | VLHHQSVACQRKPMSPLELATMAR            | 0.90 | 0.01 |
| 818 | SPLGSPR                             | 0.90 | 0.32 |
| 819 | RHNRVGMPLGSMPIPK                    | 0.90 | 0.12 |
| 820 | FFLGGPLTLRGFNIK                     | 0.90 | 0.05 |
| 821 | VLYTYKASEDMAATESMPLLGYEVRTLSTWFEGCK | 0.90 | 0.02 |
| 822 | MTTVGVNASQPDRVDALR                  | 0.90 | 0.01 |
| 823 | GTPTLTQFFNKKDCK                     | 0.90 | 0.02 |
| 824 | MKSDNKGVGCSK                        | 0.90 | 0.01 |
| 825 | LSAASLLDCPNARKMSSVSLMESPYRR         | 0.90 | 0.01 |
| 826 | EISILEGEMYQLSHMLSDQKILMSSMMAMSLVSDK | 0.90 | 0.00 |
| 827 | KMAGFSR                             | 0.90 | 0.02 |
| 828 | MLYETGIFSR                          | 0.90 | 0.00 |
| 829 | FQHRCVSVFMDKK                       | 0.90 | 0.02 |
| 830 | SPDGLITMNNFR                        | 0.90 | 0.11 |
| 831 | LGFEPPDRK                           | 0.90 | 0.05 |
| 832 | TLGAEKRSRPDDTESTIVMR                | 0.90 | 0.01 |
| 833 | KLVARVSEQMANPDMGR                   | 0.90 | 0.00 |
| 834 | NAMPDVLDPVK                         | 0.90 | 0.00 |
| 835 | TKASKVTSFPDAGK                      | 0.90 | 0.00 |
| 836 | VNGALPDTTSNVTDSENK                  | 0.90 | 0.00 |
| 837 | ISEGNLMSGTVPDIR                     | 0.90 | 0.00 |
| 838 | APHATSNRYVVCLEK                     | 0.90 | 0.00 |
| 839 | IRKLFNLXKEDDVR                      | 0.90 | 0.03 |
| 840 | MFNLLEIDSTK                         | 0.90 | 0.01 |
| 841 | NSAIMSDVK                           | 0.89 | 0.00 |
| 842 | IEMAAIKSAELSSIMSKK                  | 0.89 | 0.00 |

|     |                         |      |      |
|-----|-------------------------|------|------|
| 843 | QNCIVFLSNK              | 0.89 | 0.01 |
| 844 | ICGQSFFQSRSLFTSHK       | 0.89 | 0.05 |
| 845 | YKVDGISRDFR             | 0.89 | 0.21 |
| 846 | NYKFKIRFR               | 0.89 | 0.08 |
| 847 | VLGRKSGYKLR             | 0.89 | 0.00 |
| 848 | EAlFYYSYK               | 0.89 | 0.00 |
| 849 | CISEGAPSQSKENFLK        | 0.89 | 0.00 |
| 850 | TNSWTQVANMSGR           | 0.89 | 0.00 |
| 851 | ASVGHSR                 | 0.89 | 0.07 |
| 852 | YTLSQETVDYVK            | 0.89 | 0.00 |
| 853 | ELNINDRACVKLSYLPK       | 0.89 | 0.01 |
| 854 | LANLLGDTIFFPKPIDLKVPLFK | 0.89 | 0.03 |
| 855 | KQAASRFYTLLVLK          | 0.89 | 0.01 |
| 856 | RYWPVIDDALRR            | 0.89 | 0.01 |
| 857 | LYTVQFQDALR             | 0.89 | 0.01 |
| 858 | MRFVIDKMSDVSESESCSIHK   | 0.89 | 0.00 |
| 859 | IRVSSLLMFMAAR           | 0.89 | 0.03 |
| 860 | MEPDGIMNIFRRSEK         | 0.88 | 0.07 |
| 861 | VVNLPDAWTK              | 0.88 | 0.02 |
| 862 | ISLQLPDIKMNNLLTDK       | 0.88 | 0.01 |
| 863 | DITAQIKRLNIPDK          | 0.88 | 0.00 |
| 864 | KFAWPK                  | 0.88 | 0.00 |
| 865 | EPDVILTQTIKGK           | 0.88 | 0.00 |
| 866 | QQSFIMAVSSKPKIK         | 0.88 | 0.00 |
| 867 | MLGKLYFSK               | 0.88 | 0.00 |
| 868 | LGAARSKTQMFSR           | 0.88 | 0.00 |
| 869 | VVNMYKSVR               | 0.88 | 0.03 |
| 870 | EAYKRADEVLQSHK          | 0.88 | 0.01 |
| 871 | VKTAEVATYRYK            | 0.88 | 0.00 |
| 872 | GVDQIMAEIYK             | 0.88 | 0.00 |
| 873 | MEGKSYKGVKK             | 0.88 | 0.00 |
| 874 | MSKEEEKDGMADGNGK        | 0.88 | 0.00 |
| 875 | TCKSLWLVIDNK            | 0.88 | 0.02 |
| 876 | CASTMATTYSSGSIDDK       | 0.88 | 0.01 |
| 877 | CGSATPGASSQNGK          | 0.88 | 0.01 |
| 878 | KEAKAQAATNSGEDAFEMGIK   | 0.88 | 0.00 |
| 879 | CIVKILSDKANLMK          | 0.88 | 0.00 |
| 880 | LPIYMMLVDYQKIVR         | 0.88 | 0.02 |
| 881 | DGDYFADMEGR             | 0.88 | 0.01 |
| 882 | AISGGEITDYDVMESEK       | 0.88 | 0.00 |
| 883 | KFSISSQDKFVTVMK         | 0.88 | 0.00 |
| 884 | APLVMTCVFEGSK           | 0.88 | 0.03 |
| 885 | YMSCIMLYRGDVVVK         | 0.88 | 0.00 |
| 886 | NLKLGSSELGK             | 0.88 | 0.00 |
| 887 | VSLLYDVPGYK             | 0.87 | 0.02 |
| 888 | MSALQLKDGfYK            | 0.87 | 0.00 |
| 889 | GLVTETSVLDPDEGIR        | 0.87 | 0.01 |

|     |                             |      |      |
|-----|-----------------------------|------|------|
| 890 | PDPSELNTQSKKQKGENNSDSGSDK   | 0.87 | 0.00 |
| 891 | AGSTPDLQEKDQR               | 0.87 | 0.00 |
| 892 | VQIAPDSGGMPER               | 0.87 | 0.00 |
| 893 | GYTGDPPDKRR                 | 0.87 | 0.00 |
| 894 | LKFSISRSHLEQMSFIGK          | 0.87 | 0.00 |
| 895 | SFEGAHSIKYFSDR              | 0.87 | 0.00 |
| 896 | DDMGLCELFSPSKVFD            | 0.87 | 0.03 |
| 897 | SVSFVDESHK                  | 0.87 | 0.00 |
| 898 | ARMQEAADNLGSTSSDYSFTISK     | 0.87 | 0.03 |
| 899 | VKIPVGNSMMVDYR              | 0.87 | 0.00 |
| 900 | VFTQDYDNNSDR                | 0.87 | 0.00 |
| 901 | VDYKAHMTSQFGTVLK            | 0.87 | 0.00 |
| 902 | IDYNFGDLER                  | 0.87 | 0.00 |
| 903 | CITEHFRNVYSSSK              | 0.87 | 0.04 |
| 904 | FMTLDQIVVDEKFSECRR          | 0.86 | 0.02 |
| 905 | IPPKPFPLGYAKEK              | 0.86 | 0.09 |
| 906 | LFRSLAMTTTPDR               | 0.86 | 0.02 |
| 907 | SYEXPDGQVITIGNER            | 0.86 | 0.00 |
| 908 | IEPDVGMSQLDANR              | 0.86 | 0.00 |
| 909 | KYELPDGQVITIGNER            | 0.86 | 0.00 |
| 910 | RHAARPDLMVK                 | 0.86 | 0.00 |
| 911 | MAEKSHNYPDIIEAGQK           | 0.86 | 0.00 |
| 912 | MLFTGSFCLTQKEMTDLVVK        | 0.86 | 0.01 |
| 913 | PGVLAIIANNAAGIVTSLFLR       | 0.86 | 0.00 |
| 914 | NTSPSALDATGSSTKNPK          | 0.86 | 0.00 |
| 915 | LFSVLLSRTK                  | 0.86 | 0.00 |
| 916 | MGINQTAHFSMETPVAISR         | 0.86 | 0.00 |
| 917 | FYKQHASHGFLTCLR             | 0.86 | 0.01 |
| 918 | EVSVMAKAHSDVDISR            | 0.86 | 0.00 |
| 919 | TVLFVPEPHVCERLIR            | 0.86 | 0.00 |
| 920 | VNAQQGSPENNAAFR             | 0.85 | 0.04 |
| 921 | IDVKLNPR                    | 0.85 | 0.00 |
| 922 | AIRLDPDSKLMQQEMQNLTR        | 0.85 | 0.00 |
| 923 | TNSYPNIVFDHYR               | 0.85 | 0.00 |
| 924 | TATTADYNLGAIEGR             | 0.85 | 0.00 |
| 925 | WGVMSGDITPQDYNRR            | 0.85 | 0.00 |
| 926 | KALGKKTMSSEGLAR             | 0.85 | 0.01 |
| 927 | ILQVLENDGTFGRYK             | 0.85 | 0.02 |
| 928 | VLHPVRSMGVGSTYK             | 0.85 | 0.00 |
| 929 | QGSPVGNKMPTAKPNYK           | 0.85 | 0.00 |
| 930 | FRFNLFMYSALYRK              | 0.85 | 0.15 |
| 931 | CIYNLVDKPLPGEK              | 0.85 | 0.01 |
| 932 | MYTQMTDESQDALLPR            | 0.85 | 0.00 |
| 933 | VVPDILIEQGK                 | 0.84 | 0.01 |
| 934 | PANIMFADNNCPVMDLGSSVMARTEIK | 0.84 | 0.00 |
| 935 | CHTFIGGMPVVEDK              | 0.84 | 0.00 |
| 936 | LNLAGRDLTDYLMK              | 0.84 | 0.00 |

|     |                           |      |      |
|-----|---------------------------|------|------|
| 937 | QLLMAMVVNKTTIADNYK        | 0.84 | 0.00 |
| 938 | LDNSNSIMSEIR              | 0.83 | 0.01 |
| 939 | LQWDPDHSPAGGKLVR          | 0.83 | 0.01 |
| 940 | YYGFMFDTPDRAHR            | 0.83 | 0.00 |
| 941 | IKGTDTLILLDYLK            | 0.83 | 0.00 |
| 942 | MMDKHGEDYVAMARDPMNIFQHTPK | 0.83 | 0.00 |
| 943 | RAQRFVVK                  | 0.83 | 0.00 |
| 944 | DQNHTHQMVQLQKAFVEKGQR     | 0.83 | 0.00 |
| 945 | FPDDVVMIEKVR              | 0.82 | 0.01 |
| 946 | IEKYVPDQEVQSQK            | 0.82 | 0.00 |
| 947 | YGCKWSTIEGFQFVIKEQVK      | 0.82 | 0.01 |
| 948 | LYVVQVENALLNR             | 0.81 | 0.21 |
| 949 | PDGVFISR                  | 0.81 | 0.00 |
| 950 | HMPDVAEGVGK               | 0.81 | 0.00 |
| 951 | PDGVFIINLR                | 0.81 | 0.00 |
| 952 | RLCGVFFPSLMETGR           | 0.81 | 0.01 |
| 953 | FFSTLYASMSR               | 0.80 | 0.00 |
| 954 | RLRVFSRMESEQAEK           | 0.80 | 0.00 |
| 955 | PDTVTENTFLDWPVVMNGK       | 0.80 | 0.00 |
| 956 | PDTRIVNNSFFINERAR         | 0.80 | 0.00 |
| 957 | GFAFVTFEDYDSVDK           | 0.80 | 0.00 |
| 958 | SLLVGQYEANPLIHDEMOK       | 0.80 | 0.03 |
| 959 | CAPEFTVFMASER             | 0.80 | 0.02 |
| 960 | IKAYFGKEGSSR              | 0.79 | 0.00 |
| 961 | TLFFSRDRMVEREWR           | 0.79 | 0.00 |
| 962 | TFLLVFGKK                 | 0.79 | 0.03 |
| 963 | LXSLPVLAGAITMLLTDR        | 0.79 | 0.01 |
| 964 | DARTEDKDIFGDTALLAATR      | 0.79 | 0.00 |
| 965 | SIEVGDDYNIPHWMNHSFYMSK    | 0.78 | 0.01 |
| 966 | LFVTQVEDALVGR             | 0.77 | 0.01 |
| 967 | GYDVFKAYARSK              | 0.77 | 0.04 |
| 968 | MTSVFGGSKPDSQLLTK         | 0.77 | 0.00 |
| 969 | IDIGVGDAITSGGA            | 0.76 | 0.00 |
| 970 | XSRVAELANAVVSNADQK        | 0.75 | 0.01 |
| 971 | IMVFAVQHKGK               | 0.74 | 0.00 |
| 972 | VVFINKTNILLEQQYKR         | 0.73 | 0.01 |
| 973 | CATSVQRRWRGFLGR           | 0.72 | 0.00 |
| 974 | AYVNFSK                   | 0.68 | 0.02 |
| 975 | FTVALSK                   | 0.67 | 0.01 |
| 976 | AMSKDVNR                  | 0.67 | 0.00 |
| 977 | PKIPSKK                   | 0.61 | 0.01 |
| 978 | QEEIMSAKNR                | 0.59 | 0.01 |
| 979 | ENVNVVHEAFR               | 0.00 | 0.29 |
| 980 | SRMDSRK                   | 0.00 | 0.18 |
| 981 | GGGGGRPR                  | 0.00 | 0.17 |
| 982 | MSCMSSSPR                 | 0.00 | 0.17 |
| 983 | RLDPVTQDPERMCCK           | 0.00 | 0.10 |

|      |                                     |      |      |
|------|-------------------------------------|------|------|
| 984  | SSSCYTLQELR                         | 0.00 | 0.09 |
| 985  | IMDIIRAQEQSR                        | 0.00 | 0.08 |
| 986  | SQMMTDKCQDK                         | 0.00 | 0.07 |
| 987  | RNAFSAIKFGLNR                       | 0.00 | 0.07 |
| 988  | CPSSGSLLR                           | 0.00 | 0.07 |
| 989  | LNQMVFLGYTNAVK                      | 0.00 | 0.06 |
| 990  | LGCLIMLIR                           | 0.00 | 0.06 |
| 991  | PVVGRISGGGER                        | 0.00 | 0.05 |
| 992  | IEQSSPTHNGCPEKRPK                   | 0.00 | 0.04 |
| 993  | YLMHMDKK                            | 0.00 | 0.04 |
| 994  | SMFLDLTDCQTIMTCK                    | 0.00 | 0.04 |
| 995  | TIAECLADELINASR                     | 0.00 | 0.04 |
| 996  | IRPCFEKDKSQVR                       | 0.00 | 0.04 |
| 997  | AVFKDSFCR                           | 0.00 | 0.04 |
| 998  | MSASKIFTGYRALGYVSNHVPLVTR           | 0.00 | 0.03 |
| 999  | GRGGGAIHGDR                         | 0.00 | 0.03 |
| 1000 | TRVSLQYMCQLISEIPR                   | 0.00 | 0.03 |
| 1001 | GGRGGMGGGR                          | 0.00 | 0.03 |
| 1002 | TLLRIFLHNHHGNPNK                    | 0.00 | 0.03 |
| 1003 | PSNATIVFKDPR                        | 0.00 | 0.03 |
| 1004 | VLLSTLRGALEEAKNR                    | 0.00 | 0.02 |
| 1005 | SFVMSAIIAEGVKPTLAELEK               | 0.00 | 0.02 |
| 1006 | LGQSAVKNICMK                        | 0.00 | 0.02 |
| 1007 | RLLLFGILLMGSVSSRR                   | 0.00 | 0.02 |
| 1008 | AGTMSKK                             | 0.00 | 0.02 |
| 1009 | SEICDITSNMLATIVNVDVKDSLSEFRKMMP LCK | 0.00 | 0.02 |
| 1010 | DTVKPVMCAYK                         | 0.00 | 0.02 |
| 1011 | RLSEDDKK                            | 0.00 | 0.02 |
| 1012 | CNVKKT V                            | 0.00 | 0.02 |
| 1013 | LSDFGCAQVTPELR                      | 0.00 | 0.02 |
| 1014 | MAYTADSNAPLRDVKK                    | 0.00 | 0.02 |
| 1015 | RTIANYVMSR                          | 0.00 | 0.02 |
| 1016 | HVNKPNVSKSESLSSSKLNR                | 0.00 | 0.02 |
| 1017 | LILESFGHLIPDNVKS LIMK               | 0.00 | 0.02 |
| 1018 | KAAMARGSLYSFVPDR                    | 0.00 | 0.02 |
| 1019 | VTDKPNSNEMKK                        | 0.00 | 0.02 |
| 1020 | LVRGVSDCIGSNYSR                     | 0.00 | 0.01 |
| 1021 | VSPDATVEALLR                        | 0.00 | 0.01 |
| 1022 | NPDMSMSEAKT LIMK                    | 0.00 | 0.01 |
| 1023 | NYETKQSKK                           | 0.00 | 0.01 |
| 1024 | TKCMDIIEVVSIWEKREAMK                | 0.00 | 0.01 |
| 1025 | EKMEVKAAQLAGEMASMKAR                | 0.00 | 0.01 |
| 1026 | SQRVADMVDK                          | 0.00 | 0.01 |
| 1027 | CEARRVIFGK                          | 0.00 | 0.01 |
| 1028 | GWFPQALIDANMAKVLMDFLNDLR            | 0.00 | 0.01 |
| 1029 | DISGVSPKCTDSK                       | 0.00 | 0.01 |
| 1030 | GTVRYKGPVATKK                       | 0.00 | 0.01 |

|      |                          |      |      |
|------|--------------------------|------|------|
| 1031 | KPSSPLR                  | 0.00 | 0.01 |
| 1032 | AKDKDTMSDIGGSSKK         | 0.00 | 0.01 |
| 1033 | MMGNKLCAPLLSKK           | 0.00 | 0.01 |
| 1034 | LDALKTMLAYPDVR           | 0.00 | 0.01 |
| 1035 | VKICNPK                  | 0.00 | 0.01 |
| 1036 | GYQAIAAYHGVPACR          | 0.00 | 0.01 |
| 1037 | IACSVSFLHGAMFHFIVCMMDR   | 0.00 | 0.01 |
| 1038 | DSKKMYAMK                | 0.00 | 0.01 |
| 1039 | SFSCRSNLAHHK             | 0.00 | 0.01 |
| 1040 | VIVVAILVTGKAQCVCLTVP     | 0.00 | 0.01 |
| 1041 | MCFCTFSSVRLRQQR          | 0.00 | 0.00 |
| 1042 | ETKNTISHR                | 0.00 | 0.00 |
| 1043 | KGGLASKCVDDQELQQLR       | 0.00 | 0.00 |
| 1044 | ESFSPRSITTDQSQR          | 0.00 | 0.00 |
| 1045 | XXKSMPK                  | 0.00 | 0.00 |
| 1046 | VPKYDNPTGISHYLILK        | 0.00 | 0.00 |
| 1047 | ATERECATMNDMPYLSK        | 0.00 | 0.00 |
| 1048 | NPDMSMSEAK               | 0.00 | 0.00 |
| 1049 | SKSVDDFLDSDIDTNANCNSK    | 0.00 | 0.00 |
| 1050 | YDIKVDHR                 | 0.00 | 0.00 |
| 1051 | HSKSTATKVDR              | 0.00 | 0.00 |
| 1052 | EDILAYNQWLEGFSFGQKK      | 0.00 | 0.00 |
| 1053 | DSGIVMTPPDSTTTPDVQR      | 0.00 | 0.00 |
| 1054 | LSILYTNIPSGGSRSHAK       | 0.00 | 0.00 |
| 1055 | KASPSKTSVEKSIVSSVPK      | 0.00 | 0.00 |
| 1056 | CRSITSYFSAEGK            | 0.00 | 0.00 |
| 1057 | SMTGETNIPDEDKMRLLR       | 0.00 | 0.00 |
| 1058 | YMDFNENGSCVIGGNKCLSDKYIR | 0.00 | 0.00 |
| 1059 | SLDYGSTSAVVPQK           | 0.00 | 0.00 |
| 1060 | AETKGKKSPPR              | 0.00 | 0.00 |
| 1061 | MVQPTMDILQCDPK           | 0.00 | 0.00 |
| 1062 | VSTQWMPQPLTPDQK          | 0.00 | 0.00 |
| 1063 | INSMKVFLFLMILQMLK        | 0.00 | 0.00 |
| 1064 | MVDIGKTASSKKK            | 0.00 | 0.00 |
| 1065 | MTSKPTNSRVIK             | 0.00 | 0.00 |
| 1066 | PSPGNYDR                 | 0.00 | 0.00 |
| 1067 | SQHTNQAVFSINHYAGK        | 0.00 | 0.00 |
| 1068 | GRSVNLKSASYKVIR          | 0.00 | 0.00 |
| 1069 | SLQQGQWVGVDYR            | 0.00 | 0.00 |
| 1070 | KDDMEIVCERFTTSK          | 0.00 | 0.00 |
| 1071 | EISTGANSSKRRPNAXNK       | 0.00 | 0.00 |
| 1072 | MVLEDDGRFNFMLQPIR        | 0.00 | 0.00 |
| 1073 | YEAKLQPDSEFSPQFK         | 0.00 | 0.00 |
| 1074 | GGSGVPDFASIK             | 0.00 | 0.00 |
| 1075 | TLKLETVTPDR              | 0.00 | 0.00 |
| 1076 | NQQEKVAEMEQRIR           | 0.00 | 0.00 |
| 1077 | LCEDFERDMK               | 0.00 | 0.00 |
| 1078 | MPLSMCHK                 | 0.00 | 0.00 |
| 1079 | HTGKFMDGDDPDPKR          | 0.00 | 0.00 |

---

**Table S2.** Effect of hdTIPs on B16F10 melanoma cell viability at 200  $\mu$ M after 48 and 72 h incubations, as assayed by MTT. The data were normalized by setting 100% equal to the viability of the untreated control group. The experiments were performed in triplicate and the %cell viabilities were shown in mean $\pm$ S.D. format.

| Incubation time | B16F10 melanoma cell viability (%) after treated with hdTIPs |                  |                  |                  |                  |                  |                  |                  |
|-----------------|--------------------------------------------------------------|------------------|------------------|------------------|------------------|------------------|------------------|------------------|
|                 | TIP1                                                         | TIP2             | KNN1             | KNN2             | KNN3             | RF1              | RF2              | RF3              |
| 48 h            | 95.61 $\pm$ 8.64                                             | 95.90 $\pm$ 8.63 | 90.47 $\pm$ 4.93 | 93.53 $\pm$ 2.25 | 91.58 $\pm$ 5.73 | 93.87 $\pm$ 6.46 | 95.43 $\pm$ 8.90 | 94.18 $\pm$ 2.33 |
| 72 h            | 91.11 $\pm$ 8.36                                             | 93.98 $\pm$ 6.83 | 90.78 $\pm$ 2.28 | 90.16 $\pm$ 2.65 | 95.60 $\pm$ 4.14 | 92.80 $\pm$ 9.03 | 95.30 $\pm$ 6.28 | 93.16 $\pm$ 3.74 |



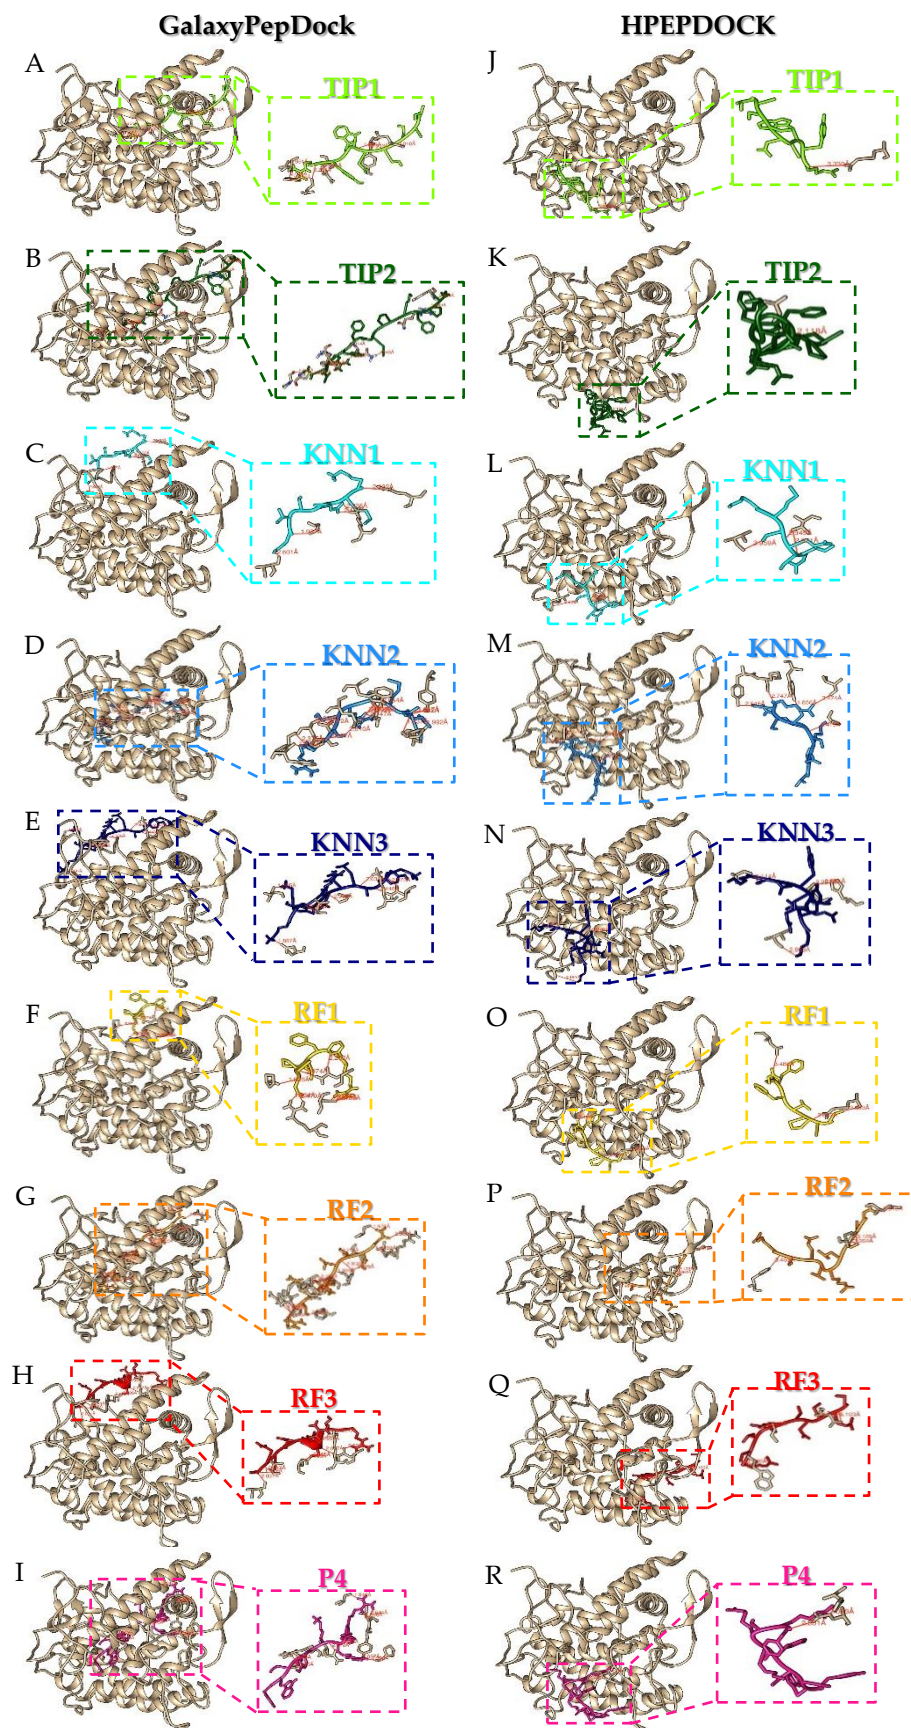

**Figure S1.** Molecular docking of hdTIPs to the tyrosinase (PDB: 2Y9X) from GalaxyPepDock (A-I) and HPEPDOCK (J-R). The tyrosinase is shaded in tan, and the peptide sequences are colored as labeled above. The hydrogen bonds are shown as red lines.

**Table S3.** List of hydrogen bonds observed from the molecular docking of peptides to the crystal structure of the tyrosinase (PDB: 2Y9X).

| GalaxyPepDock server |                  |                     |              | HPEPDOCK server |                  |                     |              |
|----------------------|------------------|---------------------|--------------|-----------------|------------------|---------------------|--------------|
| Peptides             | Peptide Residues | Tyrosinase residues | Distance (Å) | Peptides        | Peptide Residues | Tyrosinase residues | Distance (Å) |
| TIP1                 | SER 3            | GLN 41              | 2.985        | TIP1            | ARG 9            | ARG 268             | 3.330        |
|                      | ARG 9            | CYS 297             | 3.235        |                 |                  |                     |              |
|                      | ASP 5            | TYR 36              | 2.895        |                 |                  |                     |              |
|                      | ALA 6            | TYR 36              | 2.826        |                 |                  |                     |              |
|                      | ARG 9            | GLN 133             | 2.686        |                 |                  |                     |              |
|                      | ARG 9            | GLU 98              | 2.836        |                 |                  |                     |              |
|                      | ARG 9            | TYR 365             | 2.981        |                 |                  |                     |              |
|                      | ARG 9            | TYR 365             | 2.815        |                 |                  |                     |              |
| TIP2                 | ALA 2            | ARG 38              | 2.956        | TIP2            | SER 1            | GLU 226             | 2.118        |
|                      | VAL 13           | CYS 83              | 3.704        |                 |                  |                     |              |
|                      | PHE 9            | GLN 133             | 2.952        |                 |                  |                     |              |
|                      | ASP 7            | GLN 133             | 2.931        |                 |                  |                     |              |
|                      | SER 1            | TYR 165             | 3.064        |                 |                  |                     |              |
|                      | ARG 11           | TYR 365             | 2.875        |                 |                  |                     |              |
|                      | ARG 11           | GLN 133             | 2.798        |                 |                  |                     |              |
|                      | ASN 12           | GLU 98              | 2.693        |                 |                  |                     |              |
| KNN1                 | ASN 12           | PRO 91              | 3.356        | KNN1            | ILE 2            | THR 261             | 2.912        |
|                      | LYS 7            | GLN 114             | 2.992        |                 |                  |                     |              |
|                      | GLU 4            | LYS 129             | 3.001        |                 |                  |                     |              |
|                      | GLU 4            | LYS 129             | 3.108        |                 |                  |                     |              |
|                      | ASN 1            | GLY 15              | 2.765        |                 |                  |                     |              |
| KNN2                 | ASN 1            | THR 360             | 3.463        | KNN2            | SER 9            | TYR 78              | 2.646        |
|                      | THR 1            | TYR 36              | 2.861        |                 |                  |                     |              |
|                      | SER 8            | HIS 94              | 2.867        |                 |                  |                     |              |
|                      | MET 4            | TRP 101             | 2.960        |                 |                  |                     |              |
|                      | SER 2            | PRO 290             | 2.865        |                 |                  |                     |              |
|                      | GLN 3            | TYR 36              | 2.707        |                 |                  |                     |              |
|                      | GLN 3            | ILE 23              | 2.963        |                 |                  |                     |              |
|                      | SER 5            | GLU 98              | 3.018        |                 |                  |                     |              |
|                      | ARG 6            | GLN 133             | 2.829        |                 |                  |                     |              |
|                      | ARG 6            | GLN 133             | 3.246        |                 |                  |                     |              |
|                      | ARG 6            | GLN 133             | 2.890        |                 |                  |                     |              |
|                      | SER 7            | ASP 300             | 2.900        |                 |                  |                     |              |
|                      | SER 8            | HIS 94              | 2.928        |                 |                  |                     |              |
|                      | SER 8            | GLU 98              | 3.357        |                 |                  |                     |              |
|                      | SER 9            | PHE 90              | 2.724        |                 |                  |                     |              |
|                      | ARG 10           | PRO 91              | 3.329        |                 |                  |                     |              |
| KNN3                 | ALA 9            | GLN 126             | 3.203        | KNN3            | LYS 2            | ALA 323             | 3.114        |
|                      | GLU 8            | LYS 129             | 3.059        |                 |                  |                     |              |
|                      | LYS 1            | ASP 357             | 2.894        |                 |                  |                     |              |
|                      | LYS 2            | ASN 346             | 2.964        |                 |                  |                     |              |
|                      | ASN 3            | VAL 11              | 3.002        |                 |                  |                     |              |
|                      | VAL 6            | GLY 15              | 2.919        |                 |                  |                     |              |
|                      | LYS 11           | GLN 126             | 2.941        |                 |                  |                     |              |
| RF1                  | ALA 2            | GLN 126             | 3.060        | RF1             | SER 1            | ARG 268             | 3.093        |
|                      | SER 1            | ARG 132             | 3.238        |                 |                  |                     |              |
|                      |                  |                     |              |                 | ARG 7            | ASN 81              | 3.488        |

|     |        |         |       |     |       |         |       |
|-----|--------|---------|-------|-----|-------|---------|-------|
|     | SER 1  | ARG 132 | 2.863 |     | ALA 2 | ARG 268 | 2.812 |
|     | SER 1  | PRO 14  | 2.798 |     |       |         |       |
|     | PHE 6  | GLN 126 | 3.091 |     |       |         |       |
|     | ARG 7  | ASP 130 | 2.839 |     |       |         |       |
|     | ARG 7  | ASP 130 | 3.133 |     |       |         |       |
|     | ARG 7  | ASP 130 | 3.184 |     |       |         |       |
| RF2 | VAL 6  | ARG 20  | 2.711 | RF2 | ASN 1 | GLU 161 | 2.512 |
|     | ASN 1  | ARG 38  | 3.538 |     | SER 3 | GLN 153 | 3.064 |
|     | ARG 9  | ARG 95  | 2.927 |     | ARG 9 | HIS 390 | 3.469 |
|     | ARG 9  | ARG 95  | 2.852 |     | SER 3 | GLN 153 | 3.128 |
|     | LEU 4  | GLN 133 | 2.772 |     |       |         |       |
|     | SER 2  | GLN 133 | 2.832 |     |       |         |       |
|     | SER 3  | GLN 133 | 2.937 |     |       |         |       |
|     | ASN 1  | LEU 35  | 2.867 |     |       |         |       |
|     | ASN 1  | ALA 109 | 2.846 |     |       |         |       |
|     | SER 3  | LEU 131 | 2.894 |     |       |         |       |
|     | ARG 5  | GLU 98  | 3.142 |     |       |         |       |
|     | ARG 5  | TYR 97  | 2.864 |     |       |         |       |
|     | SER 8  | HIS 296 | 2.852 |     |       |         |       |
|     | ARG 9  | HIS 94  | 3.132 |     |       |         |       |
| RF3 | SER 7  | GLU 16  | 3.123 | RF3 | GLN 2 | ASP 152 | 3.103 |
|     | SER 7  | GLN 126 | 2.930 |     | ARG 6 | GLY 149 | 2.940 |
|     | ARG 6  | LYS 129 | 2.959 |     | SER 9 | TRP 141 | 3.140 |
|     | SER 9  | LYS 129 | 2.759 |     | GLN 2 | ASP 152 | 2.719 |
|     | SER 1  | VAL 11  | 2.930 |     |       |         |       |
|     | SER 1  | THR 360 | 2.986 |     |       |         |       |
|     | GLN 2  | VAL 11  | 2.827 |     |       |         |       |
|     | SER 7  | GLU 16  | 3.240 |     |       |         |       |
|     | ARG 10 | GLN 126 | 3.305 |     |       |         |       |
| P4  | SER 7  | ARG 20  | 2.714 | P4  | TYR 1 | GLU 189 | 2.351 |
|     | TYR 1  | GLN 133 | 2.780 |     | ARG 2 | HIS 285 | 2.079 |
|     | ARG 2  | LEU 35  | 2.756 |     |       |         |       |
|     | ARG 2  | ALA 109 | 2.774 |     |       |         |       |
|     | ARG 2  | LEU 35  | 3.390 |     |       |         |       |
|     | ARG 4  | TYR 36  | 3.016 |     |       |         |       |
|     | ARG 4  | PRO 175 | 3.364 |     |       |         |       |
|     | LYS 5  | GLN 133 | 2.825 |     |       |         |       |
|     | SER 7  | TYR 365 | 2.699 |     |       |         |       |

---

**Table S4.** Summary of intra-chain and inter-chain contacts with a frequency 50-100% in 10 models found by RING at Distance thresholds (Å): H-bond 3.5, Ionic 4,  $\pi$ -cation 5,  $\pi$ - $\pi$  stacking 6.5, Disulfide 2.5, Van Der Waals 0.5.

| Contact frequency      | KNN1  |       | RF1   |       | RF3   |       | TIP2  |       |
|------------------------|-------|-------|-------|-------|-------|-------|-------|-------|
|                        | Intra | Inter | Intra | Inter | Intra | Inter | Intra | Inter |
| H-bond                 | 321   | 3     | 318   | 2     | 322   | 3     | 297   | 9     |
| $\pi$ - $\pi$ Stacking | 22    | 0     | 19    | 0     | 22    | 0     | 30    | 4     |
| $\pi$ -Cation          | 0     | 0     | 0     | 0     | 1     | 0     | 0     | 0     |
| Ionic                  | 9     | 0     | 5     | 0     | 9     | 0     | 8     | 0     |
| Disulfide              | 0     | 0     | 0     | 0     | 0     | 0     | 0     | 0     |
| Van der Waals          | 185   | 1     | 172   | 0     | 203   | 1     | 133   | 18    |
